# Wing shape evolution in bombycoid moths reveals two distinct strategies for maneuverable flight

Brett R. Aiello<sup>a,b,c</sup>, Usama Bin Sikandar<sup>d,e</sup>, Hajime Minoguchi<sup>a</sup>, Katalina C. Kimball<sup>b</sup>, Chris A. Hamilton<sup>f</sup>, Akito Y. Kawahara<sup>c,g,h</sup>, and Simon Sponberg<sup>a,b</sup>

<sup>a</sup>School of Physics, Georgia Institute of Technology, Atlanta, GA 30332, USA.; <sup>b</sup>School of Biological Sciences, Georgia Institute of Technology, Atlanta, GA 30332, USA.; <sup>c</sup>Florida Museum of Natural History, University of Florida, Gainesville, FL, 32611, USA.; <sup>d</sup>School of Electrical and Computer Engineering, Georgia Institute of Technology, Atlanta, GA 30332, USA.; <sup>e</sup>Department of Electrical Engineering, Information Technology University, Lahore, Pakistan; <sup>f</sup>Department of Entomology, Plant Pathology & Nematology, University of Idaho, Moscow, ID 83844, USA.; <sup>g</sup>Entomology and Nematology Department, University of Florida, Gainesville, FL, 32608, USA.; <sup>h</sup>Department of Biology, University of Florida, Gainesville, FL, 32611, USA.

1 **A wide diversity of wing shapes has evolved, but how is aerodynamic strategy coupled to morphological variation? Here we examine how**  
2 **wing shape has evolved across a phylogenetic split between hawkmoths (Sphingidae) and wild silkmoths (Saturniidae), which have divergent**  
3 **life histories, but agile flight behaviors. Combined with kinematics of exemplar species, we find that these two diverse sister families have**  
4 **evolved two distinct strategies for agile flight. Each group has evolved distinct wing shapes in phylogenetic PCA-space. The notoriously**  
5 **agile hawkmoths have not evolved wing shapes typical of maneuverability, but rather ones that reduce power. Instead their kinematics**  
6 **favor maneuverability, primarily through higher wingbeat frequency. In contrast, silkmoths evolved maneuverable wing shapes and use**  
7 **kinematics that reduce power. Therefore, multiple strategies have evolved to achieve similar aerodynamic performance. We suggest flapping**  
8 **wings provide flexible aerodynamics through kinematics and might release morphological constraints, enabling the diversity of wing shapes**  
9 **across extant flyers.**

wing shape | moth | flight | evolution | aerodynamics | maneuverability

## 1 INTRODUCTION

2 The functional demands associated with the behavioral repertoire of a species can drive the evolution of  
3 locomotor morphology and appendage movement. The wings are a prominent and morphologically diverse  
4 features of flying animals (Wootton, 1992; Le Roy et al., 2019), which impact moments of inertia and  
5 aerodynamics (Dudley, 2000). Wing shape varies across many groups of flying organisms, but unlike fixed  
6 wings, flapping wing aerodynamics also depend on active wing movement. These multiple factors make it  
7 challenging to link evolutionary patterns of wing shape to the larger strategies of aerodynamic performance  
8 employed by animals or to translate these patterns to engineered flapping wing design.

9 The wing shape of insects, the most speciose clade of extant animals, likely faces strong selective pressures  
10 to meet the functional demands of a species (Wootton, 1992). Many flying vertebrates can "morph" wing  
11 shape to modulate aerodynamic forces (Lentink et al., 2007; Crandell and Tobalske, 2011; Riskin et al.,  
12 2010; Stowers et al., 2017; Baliga et al., 2019). Flexible shapes may reduce selective pressure on wing  
13 morphology. Insects do not contain intrinsic wing musculature and cannot morph wing shape, except

14 through actuation at the hinge. However, interspecific kinematic flexibility does exist across insects, and  
15 insects employ a diversity of kinematics (Dudley, 2000). Further, alteration of the expression pattern of  
16 a single gene in *Drosophila melanogaster* can advantageously modify wing shape to significantly enhance  
17 aerodynamic agility (Ray et al., 2016), suggesting a strong genotype to phenotype link in wing shape on  
18 which selection can act. While the aerodynamics of flight can be altered through the modification of wing  
19 shape, size, and movement (kinematics), how these traits evolve within insect clades, whether distinct  
20 evolutionary groups adopt consistent flight strategies for, and how evolutionary shifts in wing shape and  
21 kinematics impact aerodynamic performance remains unclear.

22 Certain features of wing shape have known aerodynamic consequences for maneuverability, force produc-  
23 tion, and power, most notably: 1) wing loading,  $W_s = S/m_t$ , where  $S$  is the wing area and  $m_t$  is the total  
24 body mass, 2) wing aspect ratio, AR,  $AR = R^2/S$ , where  $R$  is wing span length, and 3) the distribution of  
25 area along the long axis of a wing (radius of the second moment of area,  $\hat{r}_2$ ). A decrease in  $W_s$ , absent other  
26 changes, increases maneuverability.  $W_s$  is proportional to turning radius in birds (Burns and Ydenberg,  
27 2002; Hedenstrom and Rosen, 2001), bats (Aldridge, 1987; Norberg and Rayner, 1987), and Lepidoptera  
28 (Betts and Wootton, 1988) and inversely related to rotational speeds and accelerations during maneuvers  
29 in birds (Hedenstrom and Rosen, 2001; Dakin et al., 2018) and Lepidoptera (Betts and Wootton, 1988;  
30 Berwaerts et al., 2002).  $W_s$  is also positively correlated with flight speed in both vertebrates (Norberg  
31 and Rayner, 1987) and insects (Betts and Wootton, 1988; Dudley and Srygley, 1994; Dudley, 2002). A  
32 reduction in AR increases both power requirements and maneuverability, typically through a reduction  
33 in wing moment of inertia as seen in butterflies (Betts and Wootton, 1988; Cespedes et al., 2015; DeVries  
34 et al., 2010). High AR reduces the power requirements of flight by reducing induced drag from wing tip  
35 vortices (Norberg and Rayner, 1987; Pennycuick, 1968). An increase in  $\hat{r}_2$  can decrease maneuverability  
36 through an increase in the moment of inertia of the wing as more wing area, and likely mass, is distributed  
37 more distally along the wing in comparison to a wing of a lower  $\hat{r}_2$ .

38 Although AR,  $W_s$ , and  $\hat{r}_2$  are often used to infer performance, these relationships between wing shape and  
39 performance assume that other factors remain constant; performance might depend as much on differences in  
40 wing kinematics as on wing shape. For example, rotational maneuverability can be enhanced by increasing  
41 wing beat frequency,  $n$ , which increases active torque generation (Hedrick et al., 2009). Indeed,  $n$  increases  
42 during maneuvers in hovering hawkmoths (Cheng et al., 2011) and hummingbirds (Cheng et al., 2016b).  
43 The power requirements of flight are also dependent on wing movement. While it is possible for insects to  
44 produce the same flight behavior through different sets of kinematics (Hedrick and Daniel, 2006), insects  
45 employ kinematics that minimize energy consumption (Berman and Wang, 2007). Therefore, concomitant  
46 changes in wing kinematics may produce very different aerodynamic implications for wing shape.

47 The moth superfamily Bombycoidea, provides a prime opportunity to test how wing shape evolves in a  
48 closely related species within a diverse clade of more than 5,000 species (Kitching et al., 2018; Lemaire  
49 and Minet, 1998). Within Bombycoidea, the sister families Sphingidae and Saturniidae (Breinholt et al.,  
50 2018; Kawahara et al., 2019; Hamilton et al., 2019), have ~1600 and ~3400 described species respectively  
51 (Kitching et al., 2018). These two families display an extraordinary diversity of wing shape, and strikingly  
52 divergent life history strategies (Tammeru and Haukioja, 1996) and flight behaviors. Within Sphingidae  
53 (hawkmoths), *Manduca sexta*, and more recently *Daphnis nerii*, *Hyles lineata*, and *Macroglossum stellatarum*,  
54 are models for studies on flight control (Sponberg et al., 2015; Willmott and Ellington, 1997a; Natesan  
55 et al., 2019), vision (Windsor et al., 2014; Stöckl et al., 2017b), olfaction (Hildebrand, 1996; Gage et al.,  
56 2013; Riffell et al., 2013), and multisensory integration (Roth et al., 2016). Hawkmoths are most known  
57 for their ability to sustain long duration bouts of hovering while feeding from flowers (Wasserthal, 1993;  
58 Farina et al., 1994; Sprayberry and Daniel, 2007; Sponberg et al., 2015). In addition to the evolution of  
59 the hovering behavior, hawkmoths are often described as active, fast-flying, and maneuverable (Callahan,  
60 1965; Tuttle, 2007). Some hawkmoths can successfully track flowers oscillating up to frequencies of 14 Hz  
61 (Sponberg et al., 2015; Stöckl et al., 2017a), suggesting a high degree of maneuverability. Saturniidae (wild  
62 silkmoths) is one model group for studying the predator-prey arms race (Barber et al., 2015; Kawahara  
63 and Barber, 2015; Rubin et al., 2018). Many silkmoth species display a flight behavior often described as  
64 bobbing, but can also be fast and agile when escaping from predators (Jacobs and Bastian, 2016; Janzen,  
65 1984; Lewis et al., 1993). Silkmoths lack functional mouth parts and must rely on the strictly finite energy  
66 stores, gathered during the larval period, during their entire reproductive adult life stage (Tuskes et al.,  
67 1996).

68 Here we use the wing diversity and life history differences between the sister families, Sphingidae and  
69 Saturniidae, to test if they adopt distinct flight strategies with correspondingly distinct wing shapes. First,  
70 we use museum specimens to explore how wing shape varies in an explicitly phylogenetic context across a  
71 diverse group of agile flying insects. We test the hypothesis that wing morphology diverged on two distinct  
72 trajectories when hawkmoths and silkmoths split. Alternatively, differences in wing shape and size might  
73 arise more within each group, driven by the demands of individual species.

74 We next consider measures of wing morphology (AR,  $W_s$ , and  $\hat{r}_2$ ) across Bombycoidea to test if the two  
75 groups have shapes associated with maneuverable flight. Given their flight performance and maneuverability,  
76 we hypothesize that both groups evolved forewings of low AR,  $W_s$ , and  $\hat{r}_2$ . Alternatively, because most  
77 hawkmoths (possible exception of the Ambulycini tribe) require high power output in order to sustain long  
78 bouts of hovering while feeding and because adult stage silkmoths do not feed, we hypothesize that both  
79 groups have evolved wing shapes that reduce power requirements by increasing wing AR or length or that

80 the two groups diverge for separate strategies.

81 Finally, to assess the potentially subtle interplay of shape, size, and kinematics, we quantified three-  
82 dimensional wing kinematics during forward flight from live specimens of two species representing the wing  
83 shapes of each family. We estimated quasi-steady aerodynamic force production and power requirements  
84 using a blade element model (Sane and Dickinson, 2002; Faruque and Humbert, 2010b; Cheng et al., 2016a;  
85 Han et al., 2015). Using these two species, we can place the broader differences in wing shape into the  
86 context of kinematic differences for these particular species. Determining whether major transitions in  
87 flight strategy occur through changes in wing shape, kinematics, or their combination will broadly inform  
88 the evolution of animal flight and our ability to infer aerodynamic consequences from wing shape alone.

## 89 MATERIALS AND METHODS

90 **Phylogenetics.** In order to understand the evolution of wing shape across the Bombycoidea, we sampled  
91 representatives of all Bombycoidea families. In total, the phylogenetic dataset included 57 species and  
92 one outgroup – the Lasiocampidae, the sister lineage to the Bombycoidea. Sampling was highest in the  
93 Saturniidae (25 sp.) and Sphingidae (24 sp.). Sequences were a mixture of previously sequenced individuals  
94 from prior studies (Breinholt et al., 2018; Rubin et al., 2018) and novel specimens (see Table S1). AHE  
95 sequences represented 53 species, while four species had their AHE loci mined from transcriptomic data  
96 (Table S1). Nineteen species were newly sequenced for this project, while 38 came from previously published  
97 datasets (Table S1). Species were chosen in order to capture the majority of the wing shape diversity  
98 throughout the Sphingidae and Saturniidae, based on availability in the collections at the Florida Museum  
99 of Natural History, Gainesville, FL, USA (FLMNH).

100 Specimens were obtained from historically preserved dry collections and molecular tissue collections  
101 stored at the Florida Museum of Natural History. DNA extraction from pinned museum specimens followed  
102 the protocol outlined in (Hamilton et al., 2019). Field-collected specimens were stored in  $\geq 95\%$  ethanol,  
103 RNAlater (Sigma Aldrich, Saint Louis, MO, United States), or papered and dried with silica gel. Genomic  
104 DNA was extracted using OmniPrep Genomic DNA Extraction Kits (G-Biosciences, St. Louis, MO, USA)  
105 and DNeasy Blood and Tissue Kits (Qiagen, Valencia, CA, USA). DNA concentration was evaluated  
106 through agarose gel electrophoresis and fluorometry using a Qubit 2.0 (Invitrogen, Thermo Fisher Scientific,  
107 Carlsbad, CA, USA).

108 We used the Bombycoidea-specific ‘BOM1’ Anchored Hybrid Enrichment (AHE) probe set to target 571  
109 loci (Hamilton et al., 2019). AHE is a targeted-sequencing methodology designed to capture hundreds of  
110 unique orthologous loci (i.e., single copy, phylogenetically-informative markers) from across the genome, for  
111 resolving both shallow and deep-level evolutionary relationships (Lemmon et al., 2012; Breinholt et al.,

112 2018).

113 Library preparation, hybridization enrichment, and Illumina HiSeq 2500 sequencing (PE100) was carried  
114 out at RAPID Genomics (Gainesville, FL, USA). Specimen wing voucher and tissue storage methods  
115 follow (Cho et al., 2016). All DNA extracts and specimens preserved in ethanol, RNAlater, or those freshly  
116 papered were stored at  $-80^{\circ}$  C at the FLMNH, McGuire Center of Lepidoptera and Biodiversity (MGCL).  
117 Historically preserved dry collection specimens were kept in their traditional storage method - pinned in  
118 their tray or papered in a box, at the MGCL.

119 The bioinformatics pipeline of (Breinholt et al., 2018) was used to clean and assemble raw Illumina reads  
120 for each AHE locus. The pipeline uses a probe-baited iterative assembly that extends beyond the probe  
121 region, checks for quality and cross contamination due to barcode leakage, removes paralogs, and returns a  
122 set of aligned orthologs for each locus and taxon of interest. To accomplish these tasks, the pipeline uses  
123 the *Bombyx mori* genome (Xia et al., 2004), and the BOM1 AHE reference library. Previously published  
124 scripts (Breinholt et al., 2018) and instructions (Hamilton et al., 2019) on the pipeline are available in  
125 Dryad (<https://doi.org/10.5061/dryad.5df18fp>).

126 Loci for phylogenetic analysis were selected by applying a cutoff of  $\geq 60\%$  sampled taxa recovery (i.e., for  
127 a locus to be included in the analysis, the locus had to be recovered in at least 60% of the sampled taxa).  
128 The pipeline evaluates density and entropy at each site of a nucleotide sequence alignment. We elected  
129 to trim with entropy and density cutoffs only in flanking regions, allowing the probe region (exon) to be  
130 converted into amino acid sequences. For a site (outside of the probe region) to remain, that site must then  
131 also pass a 60% density and 1.5 entropy (saturation) cutoff, rejecting sites that fail these requirements. A  
132 higher first value (60) increases the coverage cutoff (e.g., a site is kept if 60% of all taxa are represented at  
133 that site). A higher second value (1.5) increases the entropy cutoff (i.e., entropy values represent the amount  
134 of saturation at a site); sites with values higher than 1.5 possess higher saturation and are thus deleted).  
135 Following (Hamilton et al., 2019), we built and utilized a Pr+Fl dataset; a concatenated dataset consisting  
136 of 605 probe regions + a flanking supermatrix for phylogeny inference. The final dataset comprised 606 loci  
137 and 222,369 bp.

138 AliView v1.18 (Larsson, 2014) was used to translate the nucleotides to amino acids, check for frame shifts,  
139 and edit sequencing errors or lone/dubious indels. Because flanking sequences are generally non-coding  
140 and sites have been deemed homologous, the flanking sequences (i.e., those before and after the probe  
141 regions), were separated from the exons, then combined and treated together as an independent partition.  
142 Due to the filtering steps in the bioinformatics pipeline (i.e., site orthology, and density and saturation  
143 evaluation), the flanking partition can be viewed as a SNP supermatrix, where each site is homologous and  
144 independent, but uninformative sites, saturated sites, or sites with large amounts missing data removed.

145 Specimens whose AHE loci were mined from transcriptomes did not have flanking data due to the nature  
146 of transcriptomic data.

147 A concatenated supermatrix was assembled using FASconCAT-G v1.02 (Kueck and Longo, 2014).  
148 Phylogenetic inference was performed in a maximum likelihood (ML) framework using IQ-TREE v1.5.3  
149 (Nguyen et al., 2015). Within this framework we searched for the most appropriate model of nucleotide  
150 substitution, as well as 1000 random addition sequence (RAS) replicates, and 1000 replicates each for both  
151 ultrafast bootstraps (UFBS) and SH-aLRT tests to find the “best” tree and node support. We classified  
152 nodes as well-supported if they were recovered with support values of UFBS  $\geq 95$  and SH-aLRT  $\geq 80$   
153 (Minh et al., 2013; Nguyen et al., 2015). All branch length estimates are in units of substitutions per  
154 site. In the ultrametric tree used for analyses, the branch lengths were scaled relative to each other. All  
155 pipeline steps and phylogenomic analyses were conducted on the University of Florida HiPerGator HPC  
156 (<http://www.hpc.ufl.edu/>). All alignment FASTA files, partition files, tree files, and other essential data  
157 files used for phylogenetic inference are available as supplementary materials on Dryad.

158 **Museum Specimen Imaging.** Moth specimens from the collections at the FLMNH were imaged using a  
159 60mm lens (Canon, Tokyo, Japan) mounted to a Canon EOS 7D camera (Canon, Tokyo, Japan). At least  
160 one individual of each of the 57 species was imaged. See Table S1 for details on the number and sex of  
161 specimens imaged per species. For this analysis, male specimens were analyzed when available (53 of 57  
162 species). We chose to focus on males because they are known to exhibit higher flight activity in comparison  
163 to females (Gilchrist, 1990; Le Roy et al., 2019).

164 **Body and Wing Measurements and Morphometrics.** The body and wing morphology was digitized from  
165 museum images using the StereoMorph package (version 1.6.2) (Olsen and Westneat, 2015) in R (version  
166 3.4.2; The R Foundation for Statistical Computing). Eight landmarks were digitized to characterize body  
167 size and shape (Fig. 1A). The rostral and caudal bases of both the forewing and hindwing were also digitized.  
168 Finally, a series of third order Bezier curves were used to outline the right forewing (Fig. 1A). The curves  
169 were then resampled using the StereoMorph package to generate 50 evenly spaced points (semilandmarks)  
170 around the wing perimeter. For species with multiple individuals, each wing was aligned at the rostral base  
171 of the wing and forewing shape was averaged to produce a mean set of 50 semilandmarks to be used in  
172 further analysis. Similarly, for species with multiple individuals, the length and width of each body segment  
173 (head, thorax, and abdomen) were averaged to obtain mean values for each species.

174 The digitized output of each moth was further analyzed in MATLAB (version R2018b - 9.5.0.944444).  
175 Body mass was estimated by modeling the body as three ellipsoids: one for the head, thorax, and abdomen.  
176 The length and width of each body segment were measured as the distance between the minimum and

177 maximum value for that segment. The width of the head was assumed to be equal to its length. The  
178 dorso-ventral depth of every segment was assumed to be equal to its width. The density of each body  
179 segment was assumed to be equal to water (Ellington, 1984a).

180 Forewing measurements began by rotating each forewing so its long axis was perpendicular to the long  
181 axis of the body. Wing length ( $R$ ) was measured as the distance between the minimum and maximum value  
182 of the wing outline. All additional wing parameters ( $AR$ ,  $W_s$ , and  $r_2$ ) were calculated following (Ellington,  
183 1984a). The wing was assumed to have a thickness equal to 0.5% mean chord length and a density equal  
184 to water. The wing area was then filled with equally distributed points that were each assigned an equal  
185 mass fraction. Wing beat frequency ( $n$ ) was estimated using an equation derived through dimensional  
186 analysis of insect body mass and wing area (Table A.1; (Deakin, 2010)). Finally, body mass specific mean  
187 inertial power of the wings ( $P_{acc}$ ) was calculated (see Table A.1) following published methods (Ellington,  
188 1984c). Stroke amplitude was not available for every species so the same half stroke amplitude of  $60^\circ$  was  
189 used across all species. The potential impact of different kinematics is discussed in the comparison of the  
190 exemplar species from which kinematics were obtained.

191 To examine the variation in forewing shape while accounting for phylogeny, we conducted a phylogenetic  
192 principal components analysis (pPCA) (Revell, 2009). A pPCA finds the dimensions of wing shape that  
193 maximize the covariance of the component shape variables, but corrects the covariance with a relatedness  
194 matrix that takes into account the shared evolutionary history of the samples. For each species, the mean  
195 forewing semilandmarks were aligned by Procrustes superimposition to obtain size and orientation corrected  
196 Procrustes coordinates (implemented with `gpgen` function in `Geomorph` R package (version 3.1.2)). Next,  
197 the pPCA was conducted on the Procrustes coordinates for each species (implemented with the `phyl.pca`  
198 function in the R package `Phytools` (version: 0.6-60) (Revell, 2012)). We then projected wing shape back  
199 on to the first four pPC axes (Olsen, 2017). To test if clades were significantly clustered in four dimensional  
200 pPC morphospace, we conducted a MANOVA where the pPC scores of pPC1, 2, 3 and 4 were used as  
201 the response variable and clade (hawkmoths, silkmoths, or ancient bombycoid lineages) was the factor.  
202 Additionally, we tested for phylogenetic signal in each wing shape variable across the full phylogeny and  
203 within each subclade (hawkmoths, silkmoths, and the clade comprising the hawkmoth-silkmoth sister  
204 families). These analyses were conducted in RStudio (version 1.1.383; RStudio, Inc., Boston, MA).

205 **Ancestral State Reconstruction.** Ancestral state reconstructions were conducted to determine the evolu-  
206 tionary history of each wing trait as well as the wing shape PC scores. Maximum likelihood ancestral  
207 state reconstructions (`fastAnc` in `phytools` R package (version 0.6.60) (Revell, 2012)) used a Brownian  
208 motion model of evolution and estimates the maximum likelihood state estimations for all internal nodes by  
209 rerooting the phylogeny at each internal node and computing the contrasts state at the root according to

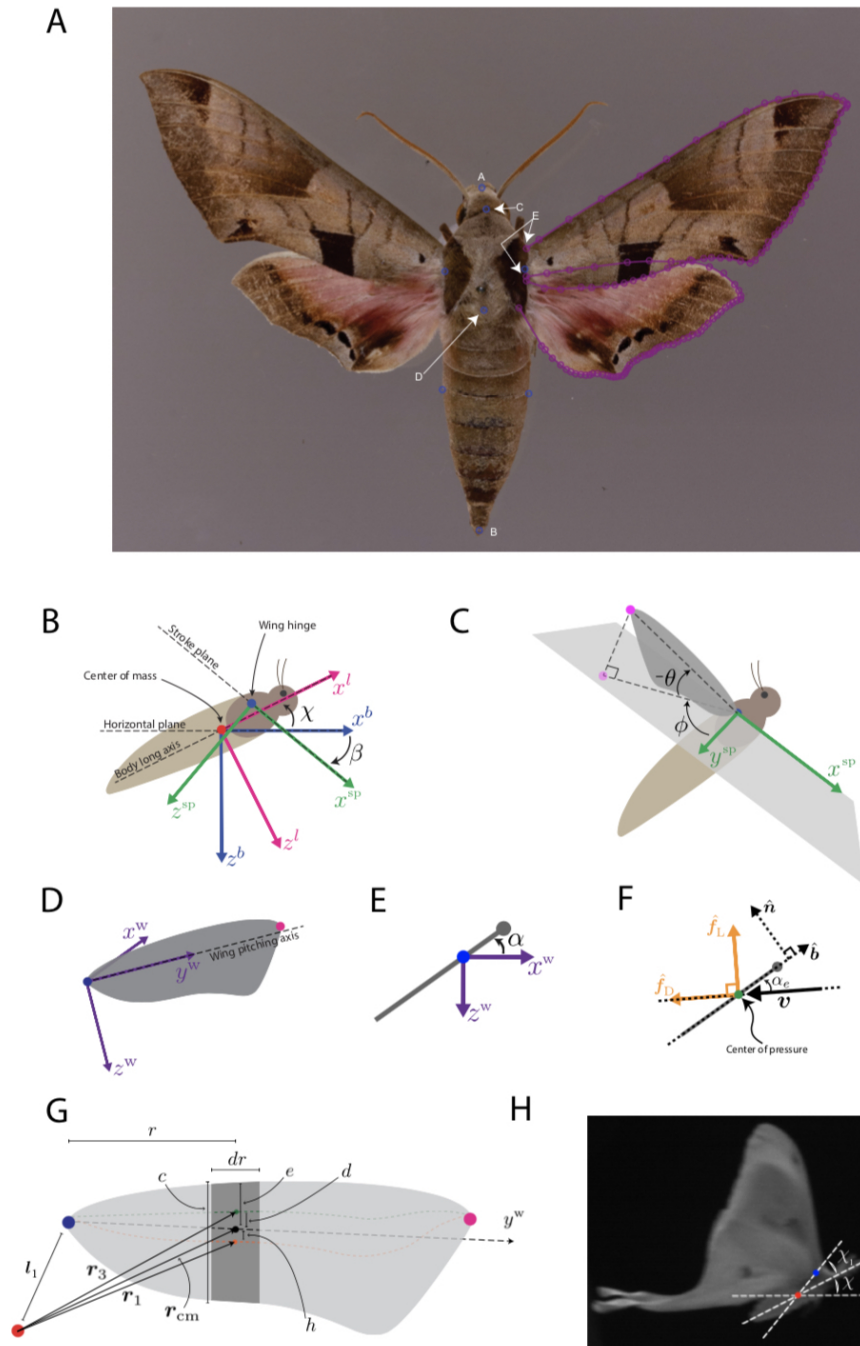

**Fig. 1. A** Summary of body landmarks and coordinate systems. Eight landmarks (blue points) capture body size and wing attachment. Sagittal landmarks were placed at the tip of the head (1), caudal tip of the abdomen (2), junction between the head and thorax (3), and junction between the thorax and abdomen (4). Parasagittal landmarks were placed at the widest points of the thorax and abdomen and the rostral and caudal base of the forewing (5) and hindwing. Each wing was outlined using a series of Bezier curves (purple points). Each curve was free to vary in perimeter length, and, typically, more points were used to generate the outline around more complex regions of the wing (see distal tip versus leading edge). **B** The body-attached coordinate frame (blue), the body-long coordinate frame (pink) and the stroke-plane frame (green). The red dot represents the location of the center of mass and the blue dot represented the wing hinge.  $\beta$  is the stroke-plane angle and  $\chi$  is the body angle. **C** Definitions of wing kinematic angles:  $\phi$  and  $\theta$  defined with respect to the stroke-plane. **D-E** The wing-attached coordinate frame and wing-pitching angle  $\alpha$ . **F** Relative airflow, effective angle of attack, and lift and drag components of the translational aerodynamic force. **G** Various length parameters relevant to a single wing strip. Red, blue, and pink circles correspond to the body center of mass, wing hinge, and wing tip. Dashed green, orange, and black lines are the quarter-chord, half-chord, and wing pitching axis, respectively. **H** Inclination angle of the wing-hinge point (blue) from the center of mass (red).



210 the contrasts algorithm ([Felsenstein, 1985](#)).

211 **Live specimens.** Live specimens were obtained as pupae from a breeder for two species: *Actias luna*  
212 (Saturniidae) and *Eumorpha achemon* (Sphingidae). These two species were chosen because they were  
213 readily available in large numbers and were also widely separated in pPCA morphospace, providing a  
214 general representative from each family. Caterpillars of each species were acquired by collecting eggs from  
215 local adult moths, and all caterpillars were reared on species-specific host plants. Pupae were stored in an  
216 incubator (Darwin Chambers, model: IN034LTDMMP, Saint Louis, MO) set to a temperature of 23° C  
217 and a relative humidity of 65%.

218 **Three-dimensional Kinematics.** Moths were transferred to the wind tunnel in individual containers with a  
219 moist tissue to prevent desiccation. Each individual was dark adapted at the wind tunnel for 1hr prior to  
220 the start of filming. Flight experiments were conducted in a 100×60.96 working section of an open-circuit  
221 Eiffel-type wind tunnel (ELD, Inc, Lake City, MN). The stream-wise turbulence of the wind tunnel does not  
222 exceed 0.5% and the flow speed did not vary by more than 2%. For a detailed overview of the specifications  
223 of the wind tunnel see ([Matthews and Sponberg, 2018](#)).

224 Moths were enticed to fly by providing a mild wind speed of 0.7 ms<sup>-1</sup>. Flight bouts were filmed at 2000  
225 frames s<sup>-1</sup> for *E. achemon* and 1000 frames s<sup>-1</sup> for *A. luna* using three synchronized Photron high-speed  
226 digital video cameras (Mini UX 100; Photron, San Diego, CA, USA) at a resolution of 1280×1024. Two  
227 cameras (one upwind and one downwind) were positioned below the wind tunnel test section at a 45° angle  
228 relative to the direction of flow. A third camera was placed laterally and orthogonal to plane of the first  
229 two cameras. The working section of the wind tunnel was illuminated with six 850Nm IR light (Larson  
230 Electronics, Kemp, TX, USA) and a neutral density filter, white LED “moon” light (Neewer CW-126) to  
231 control illumination conditions. Videos were digitized and calibrated in XMALab ([Knorlein et al., 2016](#)).  
232 From the exported 3D points we characterized the wing kinematics by calculating the following variables  
233 (Figs. 1 B-E): wing beat frequency ( $n$ ), stroke plane angle ( $\beta$ ), sweep angle ( $\phi$ ), deviation angle ( $\theta$ ), and  
234 feathering angle ( $\alpha$ ). The definition of each angle follows those outlined in ([Willmott and Ellington, 1997a](#)).

235 **Extracting the 3D Time-series Data.** We extracted the time series data of 3D coordinates of seven landmark  
236 points on a moth’s body in the lab frame: head, thorax, abdomen, left wing hinge, right wing hinge, right  
237 wing tip and a point on the trailing edge of the forewing. We tracked the coordinates of head, thorax and  
238 abdomen to estimate the orientation of the body; and the points on the right wing hinge, right wing tip  
239 and trailing edge to estimate the wing kinematics. In videos, we only extracted data from forward flight  
240 bouts. From each individual, we digitized 1 complete wingstroke that was contained within a larger set of  
241 wingstrokes during forward flight. We never digitized the first or final wingstroke from a forward flight

242 bout. For each wing stroke, at minimum, every other frame was digitized, and, in most videos, we digitized  
243 every frame. To specify the body coordinate system, we defined the absolute horizontal plane using the  
244 lateral camera view. Using the horizontal plane, we defined the absolute vertical vector, i.e. the direction of  
245 the force of gravity.

246 **Body Coordinate Frames.** We defined a body-attached frame to specify the direction of motion, and a  
247 body-long frame to keep track of the orientation of the moth's body as shown in Fig. 1B. These frames  
248 share a common origin located at the center of mass. The body-long positive  $x^l$ -axis,  $x^l$ , points from the  
249 center of mass towards the center of head; the  $z^l$ -axis is perpendicular to  $x^l$  dorsally and lies in a vertical  
250 plane that splits the moth's body into symmetric halves; the  $y^l$ -axis is the cross product of  $z^l$  and  $x^l$   
251 according to the right-handed coordinate system. The body-attached positive  $x$ -axis,  $x^b$ , starts from the  
252 center of mass and points in a direction that is the projection of  $x^l$ -axis on the absolute horizontal plane;  
253  $z^b$  points towards the direction of gravity;  $y^b$  is the cross product of  $z^b$  and  $x^b$ . This makes the  $x^b y^b$ -plane  
254 the absolute horizontal plane irrespective of moth's body orientation.

255 **Stroke-plane Coordinate Frame of the Right Wing.** We used the definition of stroke-plane in (Willmott  
256 and Ellington, 1997a) to estimate the stroke-plane for each wing stroke and then attached a coordinate  
257 frame. The origin of a stroke-plane frame is at the wing hinge point as shown in Fig. 1B. Anatomically,  
258 we defined the wing hinge point as a single point located at one-third the distance from the rostral to the  
259 caudal wing hinge. For the right wing, the positive  $x^{\text{SP}}$ -axis is in the direction of the downstroke and lies  
260 within the  $x^b$ - $z^b$  plane;  $y^{\text{SP}}$  is outward from the right wing hinge parallel to the  $y^l$ -axis in a direction from  
261 the left wing hinge to the right wing hinge; and  $z^{\text{SP}}$  is the cross-product of  $x^{\text{SP}}$  and  $y^{\text{SP}}$ .

262 **Wing-attached Coordinate Frame of the Right Wing.** To calculate the forces on the wing at each time  
263 instance, a coordinate frame attached to the wing is required. Our choice of such a coordinate frame is  
264 shown in Fig. 1D. The origin of this wing-attached frame is also at the wing hinge point. The  $y$ -axis of  
265 the wing-attached coordinate frame,  $y^w$ , is the anatomical wing-pitching axis of the moth, which was set  
266 to be perpendicular to the body-long axis and lied in the same plane as the forewing. The wing-attached  
267 coordinate frame is obtained by sequentially rotating the stroke-plane frame through wing kinematic angles  
268  $\phi$  and  $\theta$  about the current  $z$ - and  $x$ -axis respectively. Hence, the wing-attached frame rotates with the  $\phi$   
269 and  $\theta$  rotations of the wing. This means that when both  $\phi$  and  $\theta$  are equal to zero, the stroke-plane and  
270 wing-attached coordinate frames are perfectly aligned. For simplicity, our model's wing-attached frame  
271 does not rotate with the wing's pitching motion ( $\alpha$ ).

272 **Right Wing Kinematics.** The 3D time-series data of the trajectories were linearly interpolated for any frame  
273 that was not digitized and then smoothed using a moving-average filter with a window length of 10 frames.  
274 Next, we transformed the data from the camera-calibrated frame to the wing-attached frame and split the  
275 data into wing strokes starting at a wingtip position that can be kept consistent across different wing strokes.  
276 The series of transformations we applied simplified the extraction of the time series data of individual  
277 wing strokes from the start of a downstroke to the end of the subsequent upstroke. We applied a series of  
278 transformations to transform the data from the camera-calibrated frame to the wing-attached frame and  
279 then split the data. The origin was shifted to the right wing hinge through a translation. This allowed the  
280 movement of the wing tip to be restricted to just the rotations.

281 The stroke plane was defined for each wing stroke using a best-fit line through the 3D wing tip trajectory  
282 and relied on the vector between the left and right wing hinges. The stroke plane was fit to each wing  
283 stroke separately. Next, we calculate the two angles of the wing kinematics: the wing sweep angle ( $\phi$ ) and  
284 the deviation angle ( $\theta$ ) with respect to the wing-stroke, as defined in Fig. 1C. These angles are basically the  
285 azimuth and elevation angles, respectively, of the wing tip with respect to the stroke-plane frame following  
286 the definitions in (Willmott and Ellington, 1997a). However, we introduced a sign flip to the deviation  
287 angle  $\theta$  to specify it as a (positive) rotation about our  $x^w$ -axis.

288 Next, we calculated the wing pitching (feathering) angle  $\alpha$  is shown in Fig. 1E, which is the angle  
289 of rotation of the wing about the  $y^w$ -axis. We found this angle by first numerically aligning the wing's  
290 surface-plane with the stroke-plane and then calculating the angle between the two planes. The wing's  
291 surface-plane was specified by two points tracked on the forewing and the third point at the wing hinge.  
292 The alignment was performed by reversing the  $\theta$  (stroke deviation) rotation at each time instance. The  
293 stroke-plane angle  $\beta$  for each wingstroke was calculated as the smaller angle between the stroke-plane and  
294 the  $x^b$ - $y^b$  plane, assuming that during one wingstroke the stroke plane did not rotate with respect to the  
295 body-attached frame. The body angle specifies the pitch orientation of the body-long coordinate frame  
296 with respect to the body-attached frame. The body angle  $\chi$  for each wing stroke was calculated as the  
297 smaller angle between the wing stroke-averaged  $x^l$ -axis and the  $x^b$ - $y^b$  plane.

298 **Fitting a Fourier Series to the Wing Kinematics.** In total, we extracted right wing kinematics from three  
299 individual moths of both species for a total of three wing strokes from *E. achemon* and three wing strokes  
300 from *A. luna*. For each species, we first time-scaled the wing kinematics data from the three wing strokes  
301 to their mean time period and calculated the mean  $\phi$ ,  $\theta$  and  $\alpha$ . We then, for each species, fit the following

302 third order Fourier series to the species averaged wing kinematic angles:

$$303 \quad \phi(t) = a_{\phi,0} + \sum_{k=1}^3 a_{\phi,k} \cos(2\pi knt) + b_{\phi,k} \sin(2\pi knt), \quad [1]$$

$$304 \quad \theta(t) = a_{\theta,0} + \sum_{k=1}^3 a_{\theta,k} \cos(2\pi knt) + b_{\theta,k} \sin(2\pi knt), \quad [2]$$

$$305 \quad \alpha(t) = a_{\alpha,0} + \sum_{k=1}^3 a_{\alpha,k} \cos(2\pi knt) + b_{\alpha,k} \sin(2\pi knt), \quad [3]$$

306 where  $n$  is the wingbeat frequency and  $a_{\phi,k}$ ,  $a_{\theta,k}$ ,  $a_{\alpha,k}$ ,  $b_{\phi,k}$ ,  $b_{\theta,k}$ ,  $b_{\alpha,k}$  are the Fourier series coefficients. The  
307 values of the Fourier coefficients are summarized in Table 2 and the graphs of the Fourier-fitted wing  
308 kinematics are shown in Fig. 4.

309 **The blade element model.** A blade element model was used to evaluate the quasi-steady aerodynamic forces  
310 produced during flapping flight for two species: *A. luna* and *E. achemon* (details in the next section).  
311 Briefly, the model estimated the contribution of translational, rotational, and added mass to the total  
312 aerodynamic force (Sane and Dickinson, 2001, 2002; Faruque and Humbert, 2010a,b; Han et al., 2015; Kim  
313 et al., 2015; Cheng et al., 2016a). Although the main focus of this manuscript is on the forewing, to ensure  
314 accurate comparisons of aerodynamic forces during flight between these two species, we used the total  
315 wing area and shape generated by the overlapping forewing and hindwing as the wing shape in our blade  
316 element model. The wing size and shape used for each species was the mean wing size and shape calculated  
317 from the museum specimens used in this study. Several configurations of the model were used to assess the  
318 relative contribution of wing shape, size, kinematics and flight speed to aerodynamic force production. The  
319 specific kinematic and flight speed variables input to each model are outlined in the results. In the base  
320 model, Model 1, stroke plane angle and flight velocity (horizontal and vertical) parameters are set equal to  
321 that of the species mean obtained from the three-dimensional kinematic analysis. In Model 1, the wing  
322 kinematics are those of a third order Fourier series fit to the mean kinematics (three wing strokes from  
323 three individuals) of each species.

324 The blade-element model for forward flight includes the effects due to the steady translational motion  
325 of the wing as well as some of the unsteady nature of translation (leading edge vortex, for example) and  
326 rotation of the wing (Ellington et al., 1996; Hedrick and Daniel, 2006; Kim and Han, 2014). Some of  
327 these unsteady effects can be captured by using empirically measured lift and drag coefficients, in addition  
328 to considering the effect of force due to the added mass of the air around the airfoil (Han et al., 2015;  
329 Usherwood and Ellington, 2002). Therefore, in our model, we assumed the total aerodynamic force as the  
330 sum of the translation, rotational, and added mass forces and used empirical coefficients of lift and drag  
331 taken from a robotic flapper using dynamically scaled kinematics from the hawkmoth *Manduca sexta* (Han  
332 et al., 2015).

333 First, we provide a summary of the overall approach and then detail the specific formulation of each

334 step in the blade element model in subsequent sections. All symbols the mathematical notation used in  
335 the model are defined in Table A.1. We started by considering the wing of each species as a thin, rigid  
336 plate. As is standard in blade element models, we divided the wing into 200 chord-wise strips so that each  
337 strip could be treated as an airfoil. To calculate the aerodynamic forces on a strip, we next determined  
338 airflow velocity relative to the wing. For this, we modeled the wing motion according to the measured wing  
339 kinematics: sweep, deviation and pitching motion relative to a stroke plane inclined at a constant angle.  
340 We also consider the contribution of the body translational and rotational velocities to the overall relative  
341 airflow velocity, as in previous models (Faruque and Humbert, 2010a; Cheng et al., 2016a). This causes  
342 each blade element to have its own relative airflow velocity and effective angle of attack. We calculated  
343 the translational and rotational aerodynamic force of each blade element following (Ellington, 1984b; Kim  
344 and Han, 2014; Cheng et al., 2016a). We calculated the added-mass force in a non-inertial frame following  
345 (Maybury and Lehmann, 2004; Sane and Dickinson, 2001), which considers both the translational and  
346 rotational acceleration of the wing as well as the non-inertial nature of the wing-attached frame. We  
347 calculated all the aerodynamic forces in a coordinate frame attached to the wing and then summed over all  
348 the strips to calculate the total force on the wing. We also calculated aerodynamic moments using moment  
349 arms that assume translational force acting at a quarter-chord distance from the leading edge while the  
350 rotational and added-mass forces act at a half-chord distance (Ellington, 1984b; Han et al., 2015; Truong  
351 et al., 2011). Then we transformed aerodynamic forces and moments to the body-attached frame, which  
352 is an inertial frame if the moth is flying at a constant velocity with no body rotations. In the end, we  
353 calculated induced power for further comparison of the flight performance of the two species.

354 **Relative Airflow Velocity.** We defined relative airflow velocity  $\mathbf{v}$  of a small blade element strip as the velocity  
355 of the airflow relative to the strip. This relative airflow is caused by the overall motion of the strip relative  
356 to the surrounding air due to its rotation about the wing hinge, body translation and rotation, and possibly  
357 wind.

$$358 \quad \mathbf{v}^w = - \left( \mathbf{v}_b^w + \boldsymbol{\omega}_b^w \times \mathbf{r}_{cm}^w + \begin{bmatrix} -r\dot{\phi} \\ 0 \\ r\dot{\theta} \end{bmatrix} \right) \quad [4]$$

359 where  $\mathbf{v}_b^w$  is the body velocity relative to the wind but measured in the wing-attached frame,  $\boldsymbol{\omega}_b^w$  is the  
360 body angular velocity pseudovector in the wing-attached coordinate frame,  $\mathbf{r}_{cm}^w$  is the vector from the body  
361 center of mass to the center of the strip,  $r$  is the distance from wing hinge to the vertical mid-chord line of  
362 the strip (see Fig. 1G), and  $\dot{\phi}$  and  $\dot{\theta}$  are the stroke positional (sweep) and stroke deviation angular velocities  
363 of the wing, respectively. For the calculations performed on the data relevant to this paper, there were no  
364 body rotations so  $\boldsymbol{\omega}_b^w$  was equal to zero.

365 **The Effective Angle of Attack.** The effective angle of attack of the strip is defined as the angle between the  
 366 chord line vector from leading edge to the trailing edge and the relative airflow vector. This angle is  
 367 calculated as

$$368 \quad \alpha_e = \cos^{-1} \left( -\hat{\mathbf{b}}^w \cdot \hat{\mathbf{v}}^w \right), \quad \alpha_e \in [0, \pi). \quad [5]$$

369 where  $\hat{\mathbf{b}}^w = \begin{bmatrix} \cos \alpha & 0 & -\sin \alpha \end{bmatrix}^\top$  is the unit vector along the chord line in the direction from the trailing  
 370 edge of the strip to its leading edge, and  $\alpha$  is the feathering angle of the strip. We defined a second effective  
 371 angle of attack  $\alpha_r$  to set bounds on the values of the effective angle of attack so that it remains between  
 372 0 and  $\pi/2$  radians. In the calculation of the lift and drag aerodynamic coefficients, the effective angle of  
 373 attack was restricted between 0 and  $\pi/2$  because the coefficients we used from (Han et al., 2015) were  
 374 experimentally measured for the effective angles of attack only in this range.

$$375 \quad \alpha_r = \begin{cases} \alpha_e & 0 \leq \alpha_e \leq \frac{\pi}{2} \\ \pi - \alpha_e & \frac{\pi}{2} < \alpha_e \leq \pi \end{cases} \quad [6]$$

376 Moreover, this definition of the effective angle of attack keeps the lift and drag coefficients positive and  
 377 simplifies the model because the direction of the lift can just be specified by the lift force direction vector  
 378  $\hat{\mathbf{f}}_L$  elaborated in the next section.

379 **Translational Aerodynamic Force.** The translational aerodynamic force is the sum of the lift and drag forces  
 380 on the wing and acts at the center of pressure. We assumed the center of pressure to be located on the wing  
 381 at a distance one-quarter chord length behind the leading edge (green dashed line in Fig. 1G), because this  
 382 is the region at which the bound vortex has been regarded to be concentrated according to the thin airfoil  
 383 theory for both steady and unsteady aerodynamic effects (Ellington, 1984b). The lift and drag forces were  
 384 calculated using the aerodynamic coefficients of hawkmoth *Manduca sexta* taken from (Han et al., 2015).  
 385 The equations of these forces acting on a small wing strip of width  $dr$  are as follows (Cheng et al., 2016a).

$$386 \quad d\mathbf{f}_L^w = \frac{1}{2}\rho C_L v^2 c \, dr \, \hat{\mathbf{f}}_L^w, \quad [7]$$

$$387 \quad d\mathbf{f}_D^w = \frac{1}{2}\rho C_D v^2 c \, dr \, \hat{\mathbf{f}}_D^w, \quad [8]$$

388 where  $\rho$  is the air density, the aerodynamic coefficients (Han et al., 2015)

$$389 \quad C_L(\alpha_r) = 1.552 \sin(\alpha_r) \cos(\alpha_r) + 1.725 \sin^2(\alpha_r) \cos(\alpha_r), \quad [9]$$

$$390 \quad C_D(\alpha_r) = 0.0596 \sin(\alpha_r) \cos(\alpha_r) + 3.598 \sin^3(\alpha_r), \quad [10]$$

391  $v$  is the relative airflow speed of the strip,  $c$  and  $dr$  are chord length and width of a strip, and the translational  
 392 drag and lift unit vectors,  $\hat{\mathbf{f}}_L$  and  $\hat{\mathbf{f}}_D$ , are calculated as follows

$$393 \quad \hat{\mathbf{f}}_L^w = \frac{\mathbf{q}^w}{|\mathbf{q}^w|}, \quad [11]$$

$$394 \quad \hat{\mathbf{f}}_D^w = \hat{\mathbf{v}}^w, \quad [12]$$

395 where

$$396 \quad \mathbf{q}^w = (\hat{\mathbf{v}}^w \cdot \hat{\mathbf{n}}^w) ((\hat{\mathbf{v}}^w \times \hat{\mathbf{n}}^w) \times \hat{\mathbf{v}}^w) \quad [13]$$

397 and  $\hat{\mathbf{n}}^w$  is the unit vector normal to the plane of the strip in its dorsal direction (see Fig. 1F). It is  
 398 imperative to note that  $C_L$ ,  $C_D$ ,  $v$ ,  $c$ ,  $\hat{\mathbf{f}}_L$ ,  $\hat{\mathbf{f}}_D$  and  $\alpha_r$  are functions of  $r$ . Their values vary for different blade  
 399 element strips along the span of the wing. Moreover, our calculation of the unit vector  $\hat{\mathbf{f}}_L$  was sufficient  
 400 to keep track of the direction of the lift force vector, without invoking a sign from the lift coefficient  $C_L$   
 401 outside the range of the effective angle of attack from 0 to  $\pi/2$  radians. In the wing-attached coordinate  
 402 frame, the total translational aerodynamic force on a strip is

$$403 \quad d\mathbf{f}_{\text{tra}}^w = d\mathbf{f}_L^w + d\mathbf{f}_D^w. \quad [14]$$

404 **Rotational Aerodynamic Force.** In addition to the aerodynamic force due to translation of the wing, we  
 405 also incorporated the aerodynamic force due to its rotation with angular velocity  $\dot{\alpha}$  about the  $y^w$ -axis  
 406 (Fung, 1969). This force was assumed to be acting perpendicular to a blade element strip at a distance  
 407 half-chord behind the leading edge. This was based on the experimental results from (Han et al., 2015) on  
 408 a dynamically scaled hawkmoth wing. In the wing-attached coordinate frame, the rotational aerodynamic  
 409 force on a small wing strip of width  $dr$  is

$$410 \quad d\mathbf{f}_{\text{rot}}^w = \rho C_R v c^2 \dot{\alpha} dr \begin{bmatrix} -\sin \alpha \\ 0 \\ -\cos \alpha \end{bmatrix} \quad [15]$$

411 where the rotational aerodynamic coefficient  $C_R = \pi (0.75 - \frac{e}{c})$ ,  $e$  is the distance between the leading edge  
 412 and wing pitching axis,  $\alpha$  is the wing pitching angle and  $\dot{\alpha}$  is the the angular velocity of the wing pitching  
 413 rotation (Cheng et al., 2016a; Ellington, 1984b).

414 **Force due to Added-mass.** While the wing is undergoing translational and rotational accelerations during  
 415 flapping, it experiences an inertial force to accelerate the boundary layer of air around the wing surface.  
 416 Assuming the moth is flying at a constant velocity (on average), most significant contributions to this force  
 417 come from the wing accelerations  $\ddot{\phi}$  and  $\ddot{\alpha}$ , and the velocity product  $\dot{\phi}\dot{\alpha}$  due to the force being measured in a

418 non-inertial reference frame. This force acts perpendicular to a blade element strip at a distance half-chord  
 419 behind the leading edge because the boundary layer is assumed to be uniformly distributed around a blade  
 420 element strip (Truong et al., 2011). In the wing-attached coordinate frame, the force due to added-mass on  
 421 a small wing strip of width  $dr$  is given by the following equation (Maybury and Lehmann, 2004).

$$422 \quad d\mathbf{f}_{\text{adm}}^{\text{w}} = \frac{1}{4}\pi\rho \left( (\ddot{\phi} \sin \alpha + \dot{\phi}\dot{\alpha} \cos \alpha) rc(r)^2 + \frac{1}{4}\ddot{\alpha}c(r)^3 \right) dr \begin{bmatrix} \sin \alpha \\ 0 \\ \cos \alpha \end{bmatrix}, \quad [16]$$

423 where  $r$  is the distance of the wing strip from the wing hinge along the wing pitching axis.

424 **Sum of Force Components.** We numerically integrated each of the translational, rotational and added-mass  
 425 aerodynamic force equations along the wing's spanwise length to evaluate the forces on the full right wing.  
 426 Then we evaluated the sum of these forces and moments on the right wing in its wing-attached coordinate  
 427 frame as follows

$$428 \quad \mathbf{f}_{\text{right}}^{\text{w}} = \mathbf{f}_{\text{tra}}^{\text{w}} + \mathbf{f}_{\text{rot}}^{\text{w}} + \mathbf{f}_{\text{adm}}^{\text{w}}. \quad [17]$$

429 **Transformation to the Body-attached Frame.** To explore how the aerodynamic forces act on the moth's body  
 430 and affect its motion, we needed to transform the force vector calculated in the wing-attached frame to the  
 431 body-attached frame. This was done in two steps. First, we transformed the instantaneous force vector  
 432 from the wing-attached frame to the stroke-plane frame (through the wing kinematic angles  $\phi$  and  $\theta$ ) as  
 433 follows

$$434 \quad \mathbf{f}_{\text{right}}^{\text{sp}} = \mathbf{R}_z(\phi)\mathbf{R}_x(\theta)\mathbf{f}_{\text{right}}^{\text{w}}, \quad [18]$$

435 where

$$436 \quad \mathbf{R}_x(\theta) = \begin{bmatrix} 1 & 0 & 0 \\ 0 & \cos \theta & -\sin \theta \\ 0 & \sin \theta & \cos \theta \end{bmatrix}, \quad \mathbf{R}_z(\phi) = \begin{bmatrix} \cos \phi & -\sin \phi & 0 \\ \sin \phi & \cos \phi & 0 \\ 0 & 0 & 1 \end{bmatrix} \quad [19]$$

437 Second, we transformed from the stroke-plane frame to the body-attached frame (through the stroke-plane  
 438 angle  $\beta$ , given that there is no body roll rotation) through another rotation matrix

$$439 \quad \mathbf{f}_{\text{right}}^{\text{b}} = \mathbf{R}_y(-\beta)\mathbf{f}_{\text{right}}^{\text{sp}} \quad [20]$$

440 where

$$441 \quad \mathbf{R}_y(-\beta) = \begin{bmatrix} \cos \beta & 0 & -\sin \beta \\ 0 & 1 & 0 \\ \sin \beta & 0 & \cos \beta \end{bmatrix}, \quad \mathbf{l}_1^{\text{b}} = l_1 \begin{bmatrix} \cos \chi_e \\ 0 \\ -\sin \chi_e \end{bmatrix}, \quad \chi_e = \chi + \chi_1.$$



442 The angle  $\chi_e$  is the inclination angle of the wing hinge from the center of mass with respect to the horizontal  
443 plane, and is equal to the sum of body angle  $\chi$  and the angle  $\chi_1$  as shown in Fig. 1H. The overall  
444 transformation from the wing-attached frame to the body-attached frame can also be represented as a  
445 single transformation matrix  $\mathbf{R}_w^b$ ,

$$446 \quad \mathbf{f}_{\text{right}}^b = \mathbf{R}_w^b \mathbf{f}_{\text{right}}^w, \quad [21]$$

447 where  $\mathbf{R}_w^b = \mathbf{R}_y(-\beta)\mathbf{R}_z(\phi)\mathbf{R}_x(\theta)$ .

448 **Induced power calculation.** The induced power requirement for flight were also calculated for the two  
449 representative moth species. Induced power is the power required to impart sufficient momentum to the  
450 surrounding fluid in order to offset body weight as well as overcome the induced drag on the wing (Ellington,  
451 1984c). The induced aerodynamic power calculation (Table A.1) was conducted following the method  
452 outlined in (Willmott and Ellington, 1997b). Additional details on induced power can be found in the  
453 Induced Power Calculation section.

## 454 RESULTS

455 **Phylogeny.** Phylogenetic relationships of the 57 bombycoid species used in this study (Fig. 2a; S1A) show  
456 similar relationships to those published previously (Breinholt et al., 2018; Hamilton et al., 2019; Barber  
457 et al., 2015; Kawahara and Barber, 2015; Rubin et al., 2018). We recovered a monophyletic clade (sister to  
458 Bombycidae) of the Sphingidae and Saturniidae sister-families with a strong branch support values across  
459 the tree (Fig. S1A).

460 **Hawkmoths and silkmoths each have diverse, but clustered forewing shapes in morphospace.** The  
461 forewing shapes of hawkmoths and silkmoths are well separated in morphospace. Most of the varia-  
462 tion (68%) in forewing shape is explained by the first two pPC axes (44% by pPC1 and 24% by pPC2;  
463 Fig. 2B;). pPC three and four explain 14% and 8% of the total variation, respectively (Fig. S2A;). All  
464 remaining pPCs each explained less than five percent of shape variation and a total of 10% of the variation.  
465 Projections into morphospace reveal that pPC1 generally corresponds to AR, where a low pPC1 value  
466 corresponds to a higher ratio between forewing length and width. High values of pPC2 corresponding to  
467 large rounded distal tips and low values of pPC2 corresponding to a narrower distal wing tip.

468 We found significant separation in morphospace using a MANOVA where scores of 4 pPCs were the  
469 response variables and clade (hawkmoth, silkmoth, ancient bombycoid lineages) was the factor ( $F = 14.912$ ,  
470  $p = 2.33 \times 10^{-14}$ ). A second MANOVA that only included the hawkmoth and silkmoth clades (instead of all  
471 three groups) also reveals significant separation between these two clades ( $F = 44.42$ ,  $p = 6.612 \times 10^{-15}$ ),  
472 demonstrating that the differences are reflected in the split between hawkmoths and silkmoths. Additionally,

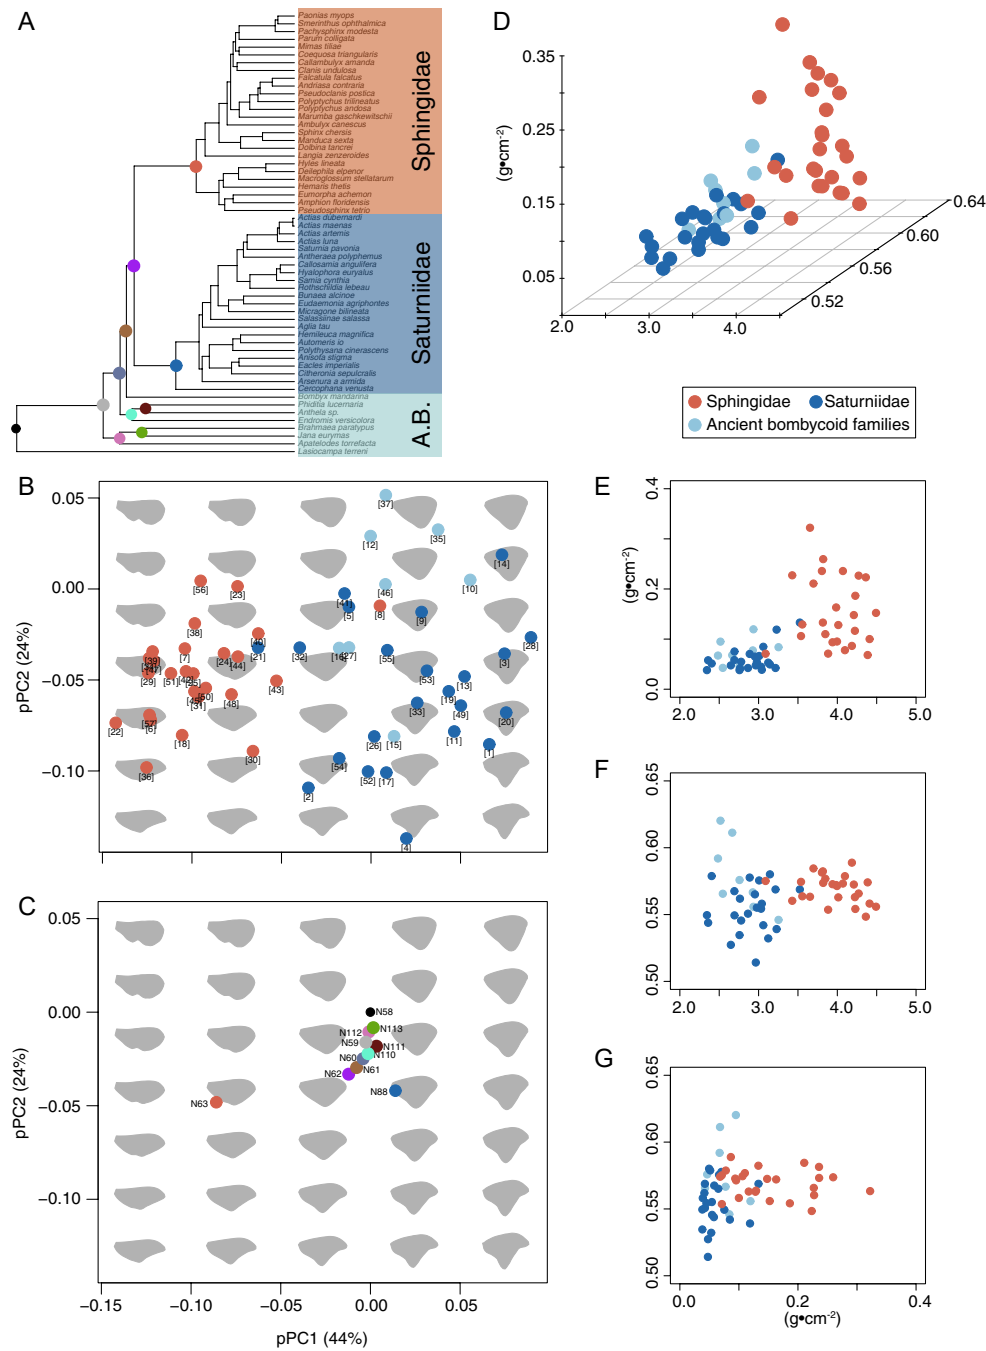

**Fig. 2.** The evolution and trajectory of forewing shape diversity. (A) The reconstruction of the phylogenetic relationships in bombycoids and outgroups (node labels in Fig. S1B). A.B. refers to Ancient Bombycoidea lineages, which do not belong to either the Saturniidae or Sphingidae clades. Ancestral nodes are color coded for plotting in C. (B) Projections of the taxa onto the first two phylogenetic principal components demonstrates the separation of extant hawkmoths and silkmooths. The complete morphospace includes pPC 3 and 4 (Fig. S2A). The species-number key can be found in Fig. S2B (C) The ancestral state reconstruction of pPC1 and pPC2 scores reveals that forewing shape was conserved throughout the early evolutionary history of the Bombycoidea superfamily until the ancestral hawkmoth (Node 63) and silkmooth (Node 88) rapidly diverged. (D) Species also cluster along aspect ratio (AR), wing loading ( $W_s$ ), and radius of the second moment of area ( $r_2^2$ ). (E-G) Bivariate projections of panel D.

473 hawkmoths and silkmoths have significant separation along pPC1 (ANOVA,  $F = 131.94$ ,  $p = 3.035 \times 10^{-15}$ ),  
474 pPC3 (ANOVA,  $F = 27.48$ ,  $p = 3.688 \times 10^{-6}$ ), and pPC4 (ANOVA,  $F = 99.63$ ,  $p = 3.4 \times 10^{-13}$ ). Finally,  
475 both the hawkmoth and silkmoth clades have significantly distinct wing shapes from those of ancient  
476 bombycoids in 4D morphospace (MANOVA, Hawkmoths:  $F = 38.188$ ,  $p = 3.65 \times 10^{-11}$ ; Silkmoths:  $F =$   
477  $3.3102$ ,  $p = 0.02555$ ).

478 We next tested if the hawkmoth and silkmoth clades have wing shape differences once accounting for  
479 phylogeny. Across the entire bombycoid phylogeny, wing shape along each pPC has significant phylogenetic  
480 signal (Table S2). This indicates that shape varies in some significant way across the phylogeny, but does  
481 not indicate where. Scores of pPC1, 3, and 4 have significant phylogenetic signal across a tree pruned to  
482 include both hawkmoths and silkmoths (Table S2). However, no phylogenetic signal was found when the  
483 tree is pruned to include only either the hawkmoths or the silkmoths (Table S2), indicating that forewing  
484 shape has significantly diverged at the node between the two sister families.

485 **Distinct evolutionary trajectories of forewing diversification.** We next reconstructed the ancestral trajec-  
486 tory of wing shape across the phylogeny, focusing on the differences that occur around the split between  
487 hawkmoths and silkmoths. Consistent with the phylogenetic signal test, the ancestral state reconstruction  
488 reveals that forewing shape was conserved (little variation in pPC score) until a distinct divergence at the  
489 nodes where hawkmoths and silkmoths split (Fig. 2C; Table S3). The range of pPC1 and pPC2 scores of  
490 the ancient nodes (nodes highlighted in 2 A, C) represent only 6.8% and 17.5% of the total variation in  
491 pPC scores of extant bombycoids (Fig. 2C) and are consistent with most of the shapes observed in the  
492 long branched “ancient bombycoid” families (Fig. 2B). The ancestral nodes of the hawkmoth (node 63)  
493 and silkmoth (node 88) sister families diverged from this cluster, indicated by minimal overlap in the 95%  
494 confidence interval of the state of these two nodes (Table S3). From these two sister nodes, each group  
495 speciated and underwent subsequent diversification. However, while individual hawkmoth or silkmoth  
496 species might have somewhat more convergent or divergent wing shapes, the two groups maintain distinct  
497 differences, especially in pPC1.

498 **Aerodynamic features of the wing and body also separate between clades.** The pPCA is a data-driven  
499 analysis of overall differences in shape. In order to relate variation in forewing shape to metrics classically  
500 used in aerodynamics, we also quantified several specific forewing and body shape variables: wing length  
501 ( $R$ ), wing mean chord length ( $\bar{c}$ ), wing area ( $S$ ), the nondimensional radius of second moment of wing area  
502 ( $\hat{r}_2$ ), wing aspect ratio (AR), wing loading ( $W_s$ ), body length ( $l_b$ ), abdomen length ( $l_{abd}$ ), the fraction  
503 of body length occupied by the abdomen ( $\hat{l}_{abd}$ ) and thorax ( $\hat{l}_{tho}$ ), respectively, and an estimate of total  
504 body mass ( $m_t$ ) (Summary data: Table 1). Before accounting for phylogeny, significant differences were

505 found between hawkmoths and silkmoths for each trait other than  $m_t$  (Table 1). Notably,  $R$ ,  $\bar{c}$ , and  $S$  are  
506 significantly greater in silkmoths than in hawkmoths, while AR,  $W_s$ , and  $\hat{r}_2$  are all significantly greater in  
507 hawkmoths than in silkmoths. While variation in  $l_b$  spans similar ranges within each family, clade average  
508  $l_b$  and  $\hat{l}_{abd}$  are significantly longer in hawkmoths than silkmoths (Table 1), and  $\hat{l}_{tho}$  is generally greater in  
509 silkmoths than in hawkmoths, (Table 1).

510 In order to determine if these morphological variables also diverged between hawkmoths and silkmoths,  
511 we again measured phylogenetic signal for each trait. As with the pPCs, significant phylogenetic signal is  
512 present when silkmoths and hawkmoths are combined, but not when the tree is pruned to consider each  
513 family individually (Table 1; S2). The only exception is  $W_s$ , which shows significant phylogenetic signal  
514 within only the hawkmoths. The lack of phylogenetic signal within the families means that the primary  
515 pattern of divergence occurs at the split of the two clades. However, given the limitations of phylogenetic  
516 sampling, specific individual hawkmoth or silkmoth taxa might still significantly diverge from the rest of  
517 the larger families.

518 We also reconstructed the ancestral states of the three most commonly used wing shape metrics: AR,  
519  $W_s$ , and  $\hat{r}_2$  (Fig. 3A-C). Each trait was conserved with large confidence intervals at the rootward nodes  
520 (Fig. 3; Table S3). However, at the nodes representing the ancestors of the hawkmoth and silkmoth clades,  
521 significant patterns of divergence are found for AR (no overlap in confidence intervals; Table S3) and  $W_s$   
522 (minimal overlap in confidence intervals; Table S3). Taken together both the data driven pPC morphospace  
523 and the specific measures of forewing shape most related to aerodynamics are first conserved and diverge  
524 precisely at the split of hawkmoths and silkmoths.

525 **Wing beat frequency, but not inertial power, diverges between hawkmoths and silkmoths.** Wing beat  
526 frequency and the power required to accelerate the mass of the wings each wingstroke (inertial power –  
527  $P_{acc}$ ) are both important values that depend on wing size. Lacking wing kinematics for all the museum  
528 specimens,  $n$  was estimated from scaling relationships (Table A.1; (Deakin, 2010)). In our analysis,  $n$   
529 is distinct from wing shape, but not independent of wing size variation. The  $P_{acc}$  calculation relies on  
530 variables of  $m_t$  and  $m_w$ , which were estimated from museum specimens by assuming the body has a density  
531 equal to water (Ellington, 1984a). Mean  $n$  is significantly greater in hawkmoths (mean  $\pm$  SD:  $33.92 \pm 11.23$   
532 Hz) compared to silkmoths (mean  $\pm$  SD:  $17.47 \pm 5.56$  Hz;  $p < 0.0001$ ), but there is no significant difference  
533 in  $P_{acc}$  between the hawkmoth and silkmoth clades (hawkmoths:  $48.65 \pm 12.97$  w  $\text{kg}^{-1}$ , silkmoths:  $41.57 \pm$   
534  $8.50$  w  $\text{kg}^{-1}$ ;  $p > 0.05$ ; Table 1).  $n$  diverges between hawkmoths and silkmoths early in the evolutionary  
535 history of bombycoids (Fig. 3E).  $n$  at the ancestral nodes for the hawkmoth and silkmoth clades are  
536 estimated to be 34.28 Hz (95% confidence interval: 27.10 – 41.47) and 22.88 Hz (95% confidence interval:  
537 14.35 – 31.41), respectively. Prior to that split, the ancestral state of  $P_{acc}$  is equivocal at rootward nodes

|                                | Average $\pm$ stdev       |                           |                            | T-test     |            |           |
|--------------------------------|---------------------------|---------------------------|----------------------------|------------|------------|-----------|
|                                | Ancient bombycoids        | Silkmoths                 | Hawkmoths                  | $p$ (AB-S) | $p$ (AB-H) | $p$ (S-H) |
| $R$ (m)                        | 0.0349 $\pm$<br>0.017151  | 0.0516 $\pm$<br>0.01638   | 0.04197 $\pm$<br>0.0150    | 0.02012    | 0.26813    | 0.03706   |
| $\bar{c}$ (m)                  | 0.0128 $\pm$<br>0.006359  | 0.0179 $\pm$<br>0.0056    | 0.01058 $\pm$<br>0.0036    | 0.04038    | 0.22018    | <0.0001   |
| $S$ (m <sup>2</sup> )          | 0.0005 $\pm$<br>0.000524  | 0.0010 $\pm$<br>0.00058   | 0.00049 $\pm$<br>0.00033   | 0.05346    | 0.77188    | 0.00034   |
| $\hat{r}_2$                    | 0.5792 $\pm$<br>0.026389  | 0.5539 $\pm$<br>0.01769   | 0.56927 $\pm$<br>0.01034   | 0.00478    | 0.12092    | 0.00046   |
| $AR$                           | 2.7600 $\pm$<br>0.265587  | 2.88959 $\pm$<br>0.28949  | 3.96152 $\pm$<br>0.337358  | 0.27537    | <0.0001    | <0.0001   |
| $l_b$ (m)                      | 0.0272 $\pm$<br>0.010591  | 0.02852 $\pm$<br>0.007602 | 0.03699 $\pm$<br>0.010579  | 0.69850    | 0.02837    | 0.00260   |
| $m_t$ (g)                      | 0.7855 $\pm$<br>0.78914   | 1.19349 $\pm$<br>0.83900  | 1.59744 $\pm$<br>1.419522  | 0.23925    | 0.13448    | 0.23920   |
| $n$ (Hz)                       | 26.5094 $\pm$<br>9.630467 | 17.4708 $\pm$<br>5.56408  | 33.9163 $\pm$<br>11.22714  | 0.00291    | 0.10248    | <0.0001   |
| $W_s$<br>(g•cm <sup>-2</sup> ) | 0.0749 $\pm$<br>0.025196  | 0.05971 $\pm$<br>0.024333 | 0.15295 $\pm$<br>0.069721  | 0.14164    | 0.00427    | <0.0001   |
| $\hat{l}_{tho}$                | 0.3008 $\pm$<br>0.059889  | 0.32948 $\pm$<br>0.032573 | 0.29120 $\pm$<br>0.029230  | 0.09752    | 0.53970    | <0.0001   |
| $\hat{l}_{abd}$                | 0.6351 $\pm$<br>0.06688   | 0.61704 $\pm$<br>0.04127  | 0.64521 $\pm$<br>0.035400  | 0.37452    | 0.57503    | 0.01334   |
| $l_{abd}$ (m)                  | 0.0175 $\pm$<br>0.007939  | 0.01771 $\pm$<br>0.00534  | 0.023979 $\pm$<br>0.007354 | 0.94196    | 0.04087    | 0.00150   |
| pPC1                           | 0.0114 $\pm$<br>0.0244    | 0.0222 $\pm$<br>0.0412    | -0.0961 $\pm$<br>0.0306    | 0.493      | <0.0001    | <0.0001   |
| pPC2                           | -0.0031 $\pm$<br>0.043370 | -0.0563 $\pm$<br>0.03847  | -0.0465 $\pm$<br>0.025442  | 0.002      | 0.001      | 0.2910    |
| pPC3                           | -0.0004 $\pm$<br>0.014623 | 0.0016 $\pm$<br>0.02405   | -0.0366 $\pm$<br>0.026721  | 0.815      | 0.001      | <0.0001   |
| pPC4                           | -0.0050 $\pm$<br>0.016029 | -0.0181 $\pm$<br>0.02798  | 0.0452 $\pm$<br>0.015287   | 0.224      | <0.0001    | <0.0001   |
| $P_{acc}$                      | 33.0317 $\pm$<br>11.13033 | 41.5706 $\pm$<br>8.49548  | 48.6594 $\pm$<br>12.97370  | 0.03143    | 0.00434    | 0.0306    |

**Table 1. Clade averaged wing and body measurements with corresponding statistics. Adjusted alpha = 0.0027778**

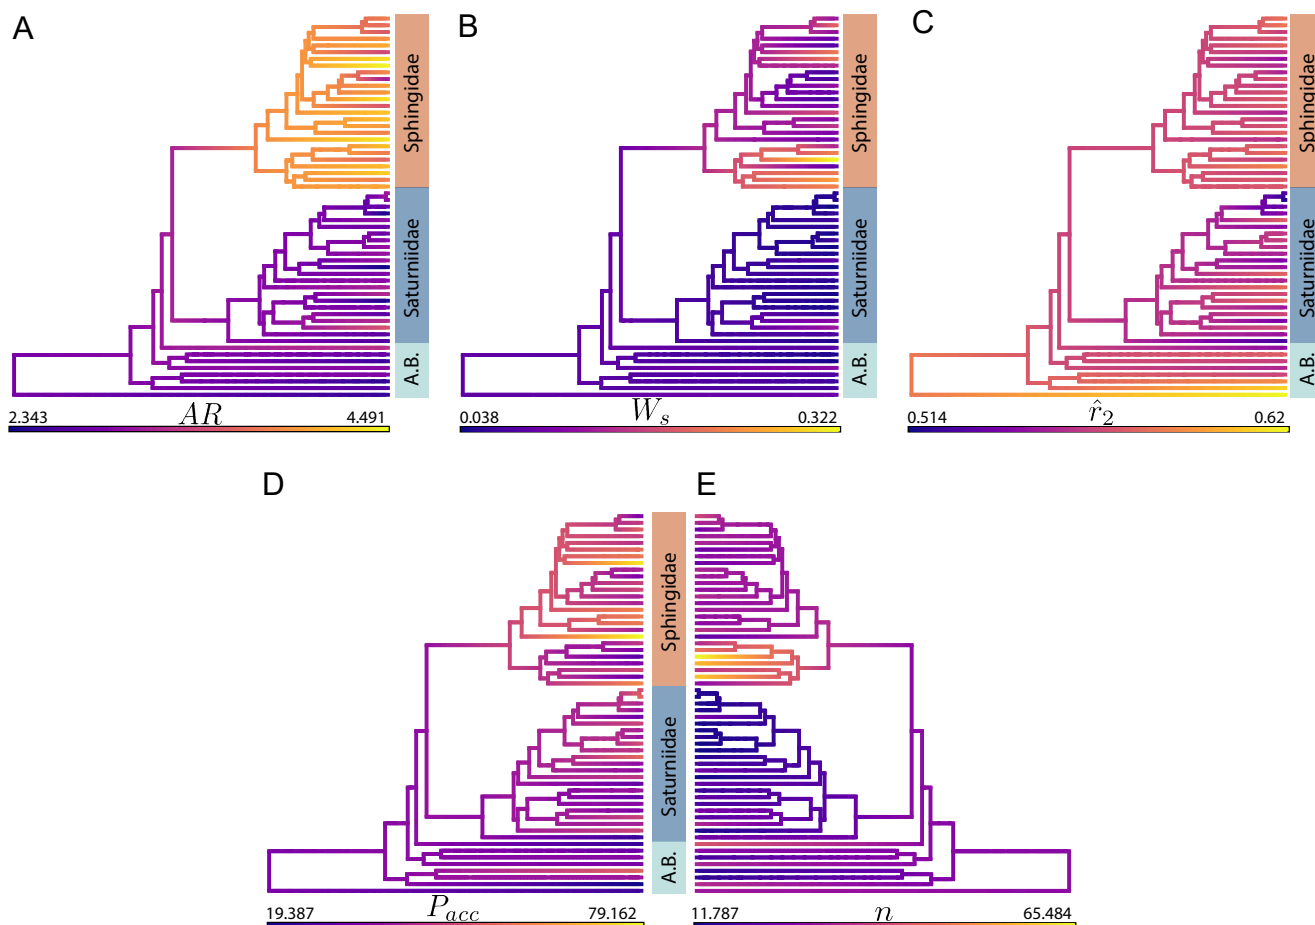

**Fig. 3.** Maximum likelihood ancestral state reconstructions of morphological variables. Ancestral state reconstructions of (A) aspect ratio ( $AR$ ) and (B) wing loading ( $W_s$ ) diverge between the hawkmoth and silkmoth sister clades. The reconstruction of (C) radius of second moment of wing area ( $\hat{r}_2$ ) is more conserved across bombycoids, but is generally shifted towards higher values in hawkmoths than silkmoths. Finally, (D) inertial power ( $P_{acc}$ ) is conserved across the superfamily with no divergence between hawkmoths and silkmoths. The reconstruction of (D) wing beat frequency ( $n$ ) also reveals strong divergence between the hawkmoth and silkmoth clades. The hawkmoth subfamily, *Macroglossinae* (Node 82), is a notable example of particularly high  $n$ .

538 (Fig. 3D; Table S3), and remains generally conserved over time. Finally, significant phylogenetic signal is  
539 found in  $n$  over the tree pruned to include only silkmoths and hawkmoths, and is also found when the tree  
540 is pruned to only include either silkmoths or hawkmoths (Table 1, S2). However, no phylogenetic signal is  
541 found for  $P_{acc}$  (Table S2).

542 **Three-dimensional body and forewing kinematics are different between the exemplar hawkmoth and**  
543 **silkmoth.** To determine the impact of wing movement on aerodynamic force production, we chose a species  
544 of hawkmoth (*E. achemon* taxa #29 in Fig. 2B) and silkmoth (*A. luna* – taxa #3 in Fig. 2B) that  
545 represent the more divergent regions of morphospace (Fig. 4A, B; Fig. 2B). Three individuals from each  
546 species were recorded conducting steady forward flight (Fig. 4C, D). *A. luna* had a lower  $n$ , more steeply  
547 inclined stroke plane,  $\beta$ , and larger wingstroke sweep,  $\phi$ , and deviation,  $\theta$ , amplitudes (Table 2; Fig. 4C, D).  
548 In comparison, *E. achemon* utilizes a greater  $\bar{\phi}$  and  $\alpha$  amplitude throughout a wing stroke (Fig. 4C, D).

549 **Wingstroke averaged forces are comparable between species.** Given that the *A. luna* and *E. achemon*  
550 use their wings in different ways in addition to having different wing shapes, we next assessed the overall  
551 aerodynamic force and power implications between the two species. Despite an interspecific difference in  
552 wing area of a factor of 3.12, the peak and wingstroke averaged body centered forces are similar in magnitude  
553 between species (Table 3). The within wingstroke force profiles do show different patterns, especially in  $f_x^b$   
554 during the first half of wing stroke and  $f_z^b$  during the second half of wing stroke; in both cases, these forces  
555 are predominately positive in *A. luna* and negative in *E. achemon* (Fig. 5a). Although the magnitude of  
556 rotational ( $f_{rot}^b$ ) and added mass ( $f_{adm}^b$ ) forces are generally larger in *A. luna* in comparison to *E. achemon*  
557 (Fig. 6A), these forces tend to act in opposition, and interspecific differences in the total body forces ( $f_{tot}^b$ )  
558 are primarily due to translational force,  $f_{trans}^b$  (Fig. 6A). To assess if flight speed might contribute to  
559 difference in aerodynamics, we conducted an additional model where the horizontal and vertical velocities  
560 are set to the species average recorded during free flight. Doing so resulted in the same patterns of force  
561 (Fig. S3A-B).

562 **Actias luna and Eumorpha achemon have similar induced aerodynamic power requirements.** While *E.*  
563 *achemon* and *A. luna* have nearly the same magnitude wing stroke averaged  $f_{tot}^b$ , the  $n$  of *E. achemon* is  
564 approximately double that of *A. luna* ( $E.a = 31.50$ ;  $A.l = 14.20$ ). Therefore, when comparing wing-stroke  
565 averaged force production per unit time, *E. achemon* produces approximately twice the force in a given  
566 amount of time in comparison to *A. luna*. These interspecific differences in force production per unit time  
567 are paralleled by an interspecific difference in the induced power ( $P_{ind}$ ) requirement. The  $P_{ind}$  requirement  
568 of *E. achemon* is  $13.758 \text{ W kg}^{-1}$ , while the  $P_{ind}$  requirement of *A. luna* is  $5.52 \text{ W kg}^{-1}$  (Table 3).

| Measured wing kinematics |                         |               |               |                    |                    |               |               |                   |
|--------------------------|-------------------------|---------------|---------------|--------------------|--------------------|---------------|---------------|-------------------|
|                          | <i>Eumorpha achemon</i> |               |               |                    | <i>Actias luna</i> |               |               |                   |
|                          | <i>E.a. 1</i>           | <i>E.a. 2</i> | <i>E.a. 3</i> | Mean $\pm$ stdev.  | <i>A.l. 1</i>      | <i>A.l. 2</i> | <i>A.l. 3</i> | Mean $\pm$ stdev. |
| $n$ (Hz)                 | 31.75                   | 33.33         | 29.41         | 31.50 $\pm$ 1.97   | 15.38              | 13.33         | 13.89         | 14.20 $\pm$ 1.06  |
| $\beta$ (deg.)           | 42.04                   | 22.94         | 36.93         | 33.97 $\pm$ 9.89   | 88.81              | 74.70         | 64.14         | 75.88 $\pm$ 12.37 |
| $\chi_{p-p}$ (deg.)      | 3.95                    | 9.91          | 4.05          | 5.97 $\pm$ 3.41    | 30.02              | 25.80         | 22.32         | 26.05 $\pm$ 3.86  |
| $\bar{\chi}$ (deg.)      | 26.83                   | 36.35         | 34.48         | 32.55 $\pm$ 5.04   | 12.57              | 27.76         | 23.14         | 23.14 $\pm$ 9.18  |
| $\phi_{p-p}$ (deg.)      | 115.34                  | 96.39         | 120.64        | 109.51 $\pm$ 12.74 | 129.01             | 132.55        | 135.78        | 127.80 $\pm$ 3.38 |
| $\bar{\phi}$ (deg.)      | 24.03                   | 31.82         | 6.28          | 19.87 $\pm$ 13.14  | 9.22               | 10.76         | 15.67         | 11.03 $\pm$ 3.42  |
| $\phi_{min}$ (deg.)      | -30.95                  | -15.55        | -49.32        | -31.70 $\pm$ 16.91 | -52.72             | -51.60        | -50.86        | -51.44 $\pm$ 0.94 |
| $\phi_{max}$ (deg.)      | 84.38                   | 80.84         | 71.31         | 77.81 $\pm$ 6.76   | 76.29              | 80.95         | 84.92         | 76.36 $\pm$ 4.32  |
| $\theta_{p-p}$ (deg.)    | 6.23                    | 9.04          | 22.24         | 11.41 $\pm$ 8.55   | 17.41              | 22.84         | 22.81         | 19.64 $\pm$ 3.12  |
| $\bar{\theta}$ (deg.)    | -2.71                   | -0.95         | 1.90          | -0.56 $\pm$ 2.36   | 2.98               | -3.20         | 3.81          | 1.18 $\pm$ 3.89   |
| $\theta_{min}$ (deg.)    | -4.92                   | -5.05         | -6.47         | -4.71 $\pm$ 0.86   | -6.63              | -18.86        | -8.03         | -10.52 $\pm$ 6.69 |
| $\theta_{max}$ (deg.)    | 1.27                    | 3.99          | 15.77         | 6.70 $\pm$ 6.29    | 10.78              | 3.89          | 14.78         | 9.13 $\pm$ 5.46   |
| $\alpha_{p-p}$ (deg.)    | 70.61                   | 92.09         | 90.11         | 80.91 $\pm$ 11.87  | 53.00              | 49.98         | 54.87         | 45.08 $\pm$ 2.47  |
| $\bar{\alpha}$ (deg.)    | 77.08                   | 87.67         | 88.74         | 84.56 $\pm$ 6.43   | 88.37              | 76.85         | 81.44         | 82.14 $\pm$ 5.82  |
| $\alpha_{min}$ (deg.)    | 44.12                   | 54.43         | 47.04         | 50.14 $\pm$ 5.31   | 60.43              | 51.77         | 56.53         | 58.49 $\pm$ 4.34  |
| $\alpha_{max}$ (deg.)    | 115.46                  | 146.41        | 136.78        | 133.02 $\pm$ 15.84 | 112.76             | 102.18        | 108.66        | 101.54 $\pm$ 5.33 |

Fourier coefficients fit to species mean wing kinematics

| Kinematic variables | $k$ | <i>E. achemon</i> |         | <i>A. luna</i> |         |
|---------------------|-----|-------------------|---------|----------------|---------|
|                     |     | $a$               | $b$     | $a$            | $b$     |
| $\phi(t)$           | 0   | 0.4006            | 0       | 0.2165         | 0       |
|                     | 1   | 0.9480            | -0.0711 | 1.0910         | -0.0309 |
|                     | 2   | 0.0074            | -0.0839 | 0              | 0       |
|                     | 3   | 0                 | 0       | 0              | 0       |
| $\theta(t)$         | 0   | -0.0133           | 0       | 0.022          | 0       |
|                     | 1   | -0.0168           | -0.0742 | -0.0025        | -0.1448 |
|                     | 2   | -0.0403           | -0.0064 | 0.0337         | 0.0102  |
|                     | 3   | -0.0082           | 0.0152  | -0.0037        | 0.0261  |
| $\alpha(t)$         | 0   | 1.4723            | 0       | 1.4360         | 0       |
|                     | 1   | -0.0525           | -0.6877 | 0.0022         | -0.3856 |
|                     | 2   | -1.597            | -0.0620 | 0.0419         | 0.0101  |
|                     | 3   | 0                 | 0       | 0.0059         | -0.0123 |

**Table 2. Summary of comparative wing kinematics for the representative hawkmoth and silkmoth species.**



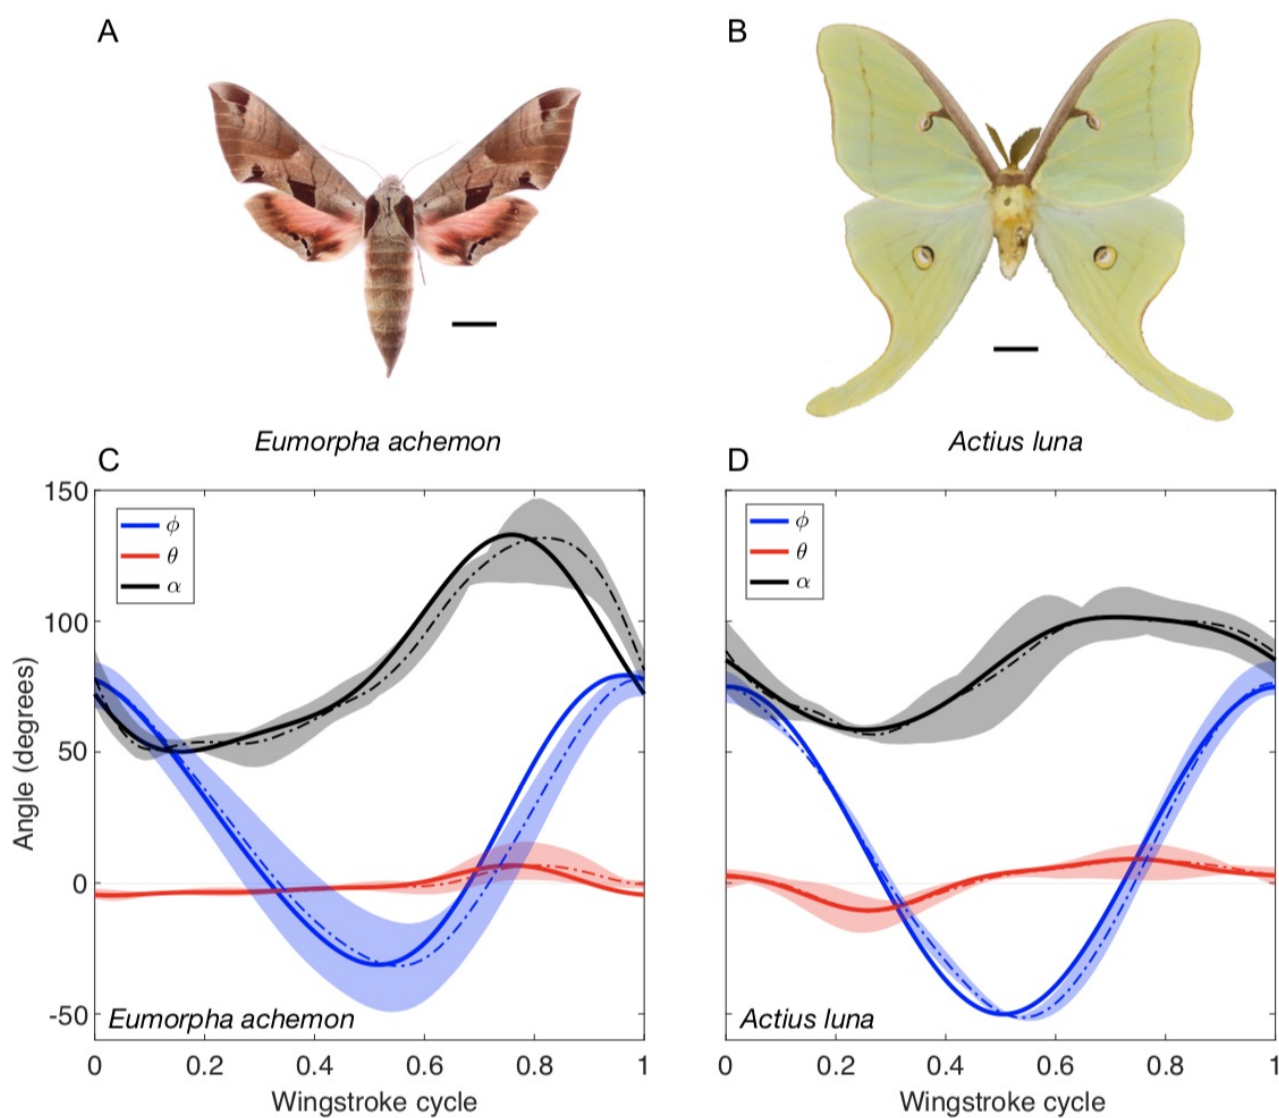

**Fig. 4.** Three-dimensional wing kinematics of a representative hawkmoth and silkmoth. *E. achemon* (A) *A. luna* (B) were flown in a wind tunnel to obtain three-dimensional kinematics (C and D). Scale bars are equal to 1 centimeter. For both species, we measured sweep ( $\phi$ , blue), deviation ( $\theta$ , red), and morphological feathering ( $\alpha$ , black) angles. The shaded region of each curve represents the range of values recorded, the dashed lines represent the species mean, and the solid line represents the third order Fourier fit, used in all aerodynamic models.  $N = 3$  individuals per species and one wing stroke per individual. The mean  $n$  is 14.2 in *A. luna* and 31.5 in *E. achemon* (Table 2).

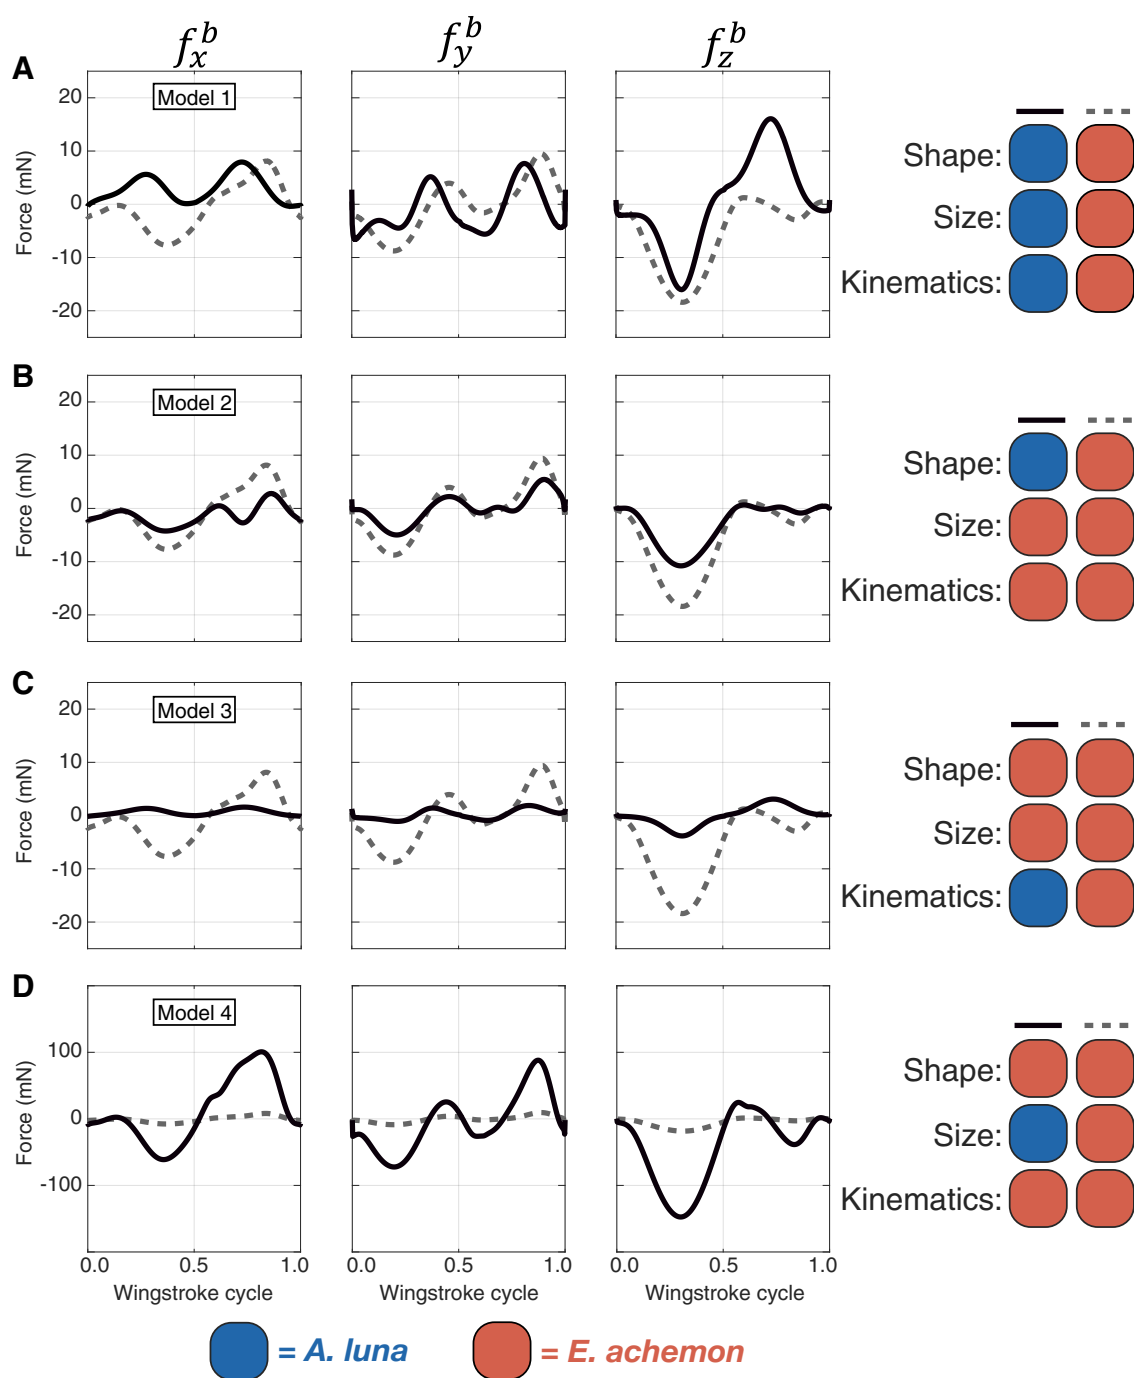

**Fig. 5.** Quasi-steady aerodynamic force production by the right wing in the body-centered coordinate system. Column one, two, and three display the  $f_x^b$ ,  $f_y^b$ , and  $f_z^b$ , respectively. The two wings of each model are identified by solid and dashed lines, respectively. The dashed line is the same in each model. The key on the right side of each model can be used to determine the specific wing shape and movement parameters used for each wing. Red represents variables from *A. luna* and blue represents variables from *E. achemon*. (A) Model 1 compares interspecific aerodynamics between *A. luna* (solid line) and *E. achemon* (dashed line). Models 2 (B), 3 (C), and 4 (D) investigate how aerodynamics are impacted by changes in wing shape, movement, and size, respectively. All forces are only presented for a single right wing. The negative  $f_z^b$  direction points upward and the positive  $f_x^b$  direction points forward in the coordinate system.

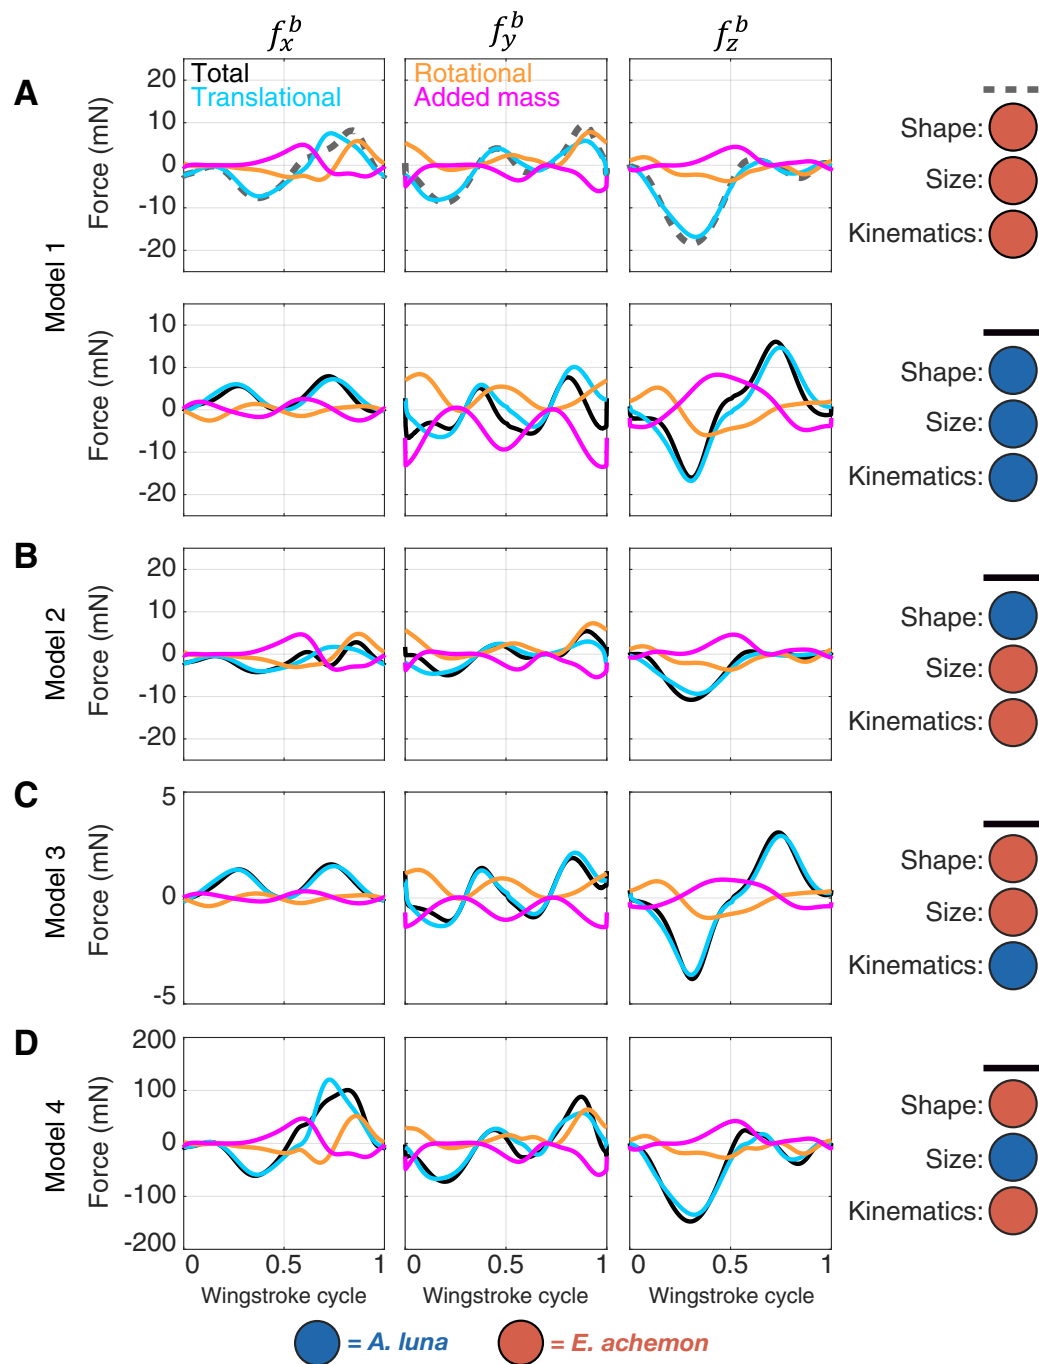

**Fig. 6.** Translational, rotational, and added mass components of aerodynamics force. Details of the four models are identical to those in Figure 5. Color schemes for component are the same for both species. Black represents the total force, cyan represents the translational force component ( $f_{trans}^b$ ), gold represents the rotational force component ( $f_{rot}^b$ ), and pink represents the added mass force component ( $f_{adm}^b$ ). Column one, two, and three display the  $f_x^b$ ,  $f_y^b$ , and  $f_z^b$ , respectively. All forces are only presented for a single right wing. In all four models for each species,  $f_{trans}^b$  drives the majority of the pattern in total force throughout the wing stroke.

| Model | Species      | $\bar{f}_{tot}^b$ (N) |        |         | $\bar{f}_{trans}^b$ (N) |        |         | $\bar{f}_{rot}^b$ (N) |        |        | $\bar{f}_{adm}^b$ (N) |         |       | Induced Power (W/kg) |
|-------|--------------|-----------------------|--------|---------|-------------------------|--------|---------|-----------------------|--------|--------|-----------------------|---------|-------|----------------------|
|       |              | $x$                   | $y$    | $z$     | $x$                     | $y$    | $z$     | $x$                   | $y$    | $z$    | $x$                   | $y$     | $z$   |                      |
| 1     | <i>E. a.</i> | -0.545                | -0.282 | -5.714  | -0.692                  | -0.606 | -5.513  | -0.243                | 1.974  | -1.162 | 0.39                  | -1.65   | 0.96  | 13.758               |
|       | <i>A. l.</i> | 2.915                 | -1.023 | 0.402   | 3.097                   | 0.771  | -0.47   | -0.244                | 3.421  | -0.422 | 0.062                 | -5.216  | 1.294 | 5.52                 |
| 2     | <i>E. a.</i> | -0.545                | -0.282 | -5.714  | -0.692                  | -0.606 | -5.513  | -0.243                | 1.974  | -1.162 | 0.39                  | -1.65   | 0.96  | 13.758               |
|       | <i>A. l.</i> | -1.342                | -0.022 | -3.022  | -1.192                  | -0.394 | -3.099  | -0.269                | 1.891  | -1.088 | 0.119                 | -1.519  | 1.165 | 7.747                |
| 3     | <i>E. a.</i> | -0.545                | -0.282 | -5.714  | -0.692                  | -0.606 | -5.513  | -0.243                | 1.974  | -1.162 | 0.39                  | -1.65   | 0.96  | 13.758               |
|       | <i>A. l.</i> | 0.648                 | 0.193  | -0.093  | 0.66                    | 0.212  | -0.15   | -0.039                | 0.546  | -0.075 | 0.027                 | -0.564  | 0.132 | 8.962                |
| 4     | <i>E. a.</i> | -0.545                | -0.282 | -5.714  | -0.692                  | -0.606 | -5.513  | -0.243                | 1.974  | -1.162 | 0.39                  | -1.65   | 0.96  | 13.758               |
|       | <i>A. l.</i> | 12.085                | -4.914 | -43.778 | 9.627                   | -3.588 | -44.082 | -1.351                | 14.777 | -9.07  | 3.809                 | -16.103 | 9.374 | 11.629               |

**Table 3. Wing stroke averaged total and component forces produced by each species across models.**

569 **Aerodynamic force production is impacted by interspecific differences in wing size, shape, and movement.** To assess how size, shape and kinematics impact the aerodynamics, we created several intermediate  
570 **ment.** models that separate their contributions. The base comparison reported above (Model 1 – Figs. 5A, 6A)  
571 uses each species’ own wing shape, size, kinematics ( $\phi$ ,  $\theta$ , and  $\alpha$ ),  $n$ , and  $\beta$ , with forward flight velocities  
572 set to 2 m/s. In Model 2 (Figs. 5B, 6B) we set wing kinematics and size to be that of *E. achemon* in both  
573 cases, leaving interspecific differences only in wing shape. In Model 3 (Figs. 5C, 6C), we set wing shape  
574 and size to be that of *E. achemon*, leaving interspecific differences only in wing kinematics. Finally, in  
575 Model 4 (Figs. 5D, 6D), we set wing shape and kinematics to be that of *E. achemon*, leaving interspecific  
576 differences only in wing size.  
577

578 **Wing shape:** The *E. achemon* wing shape produces larger net aerodynamic forces than *A. luna* shaped  
579 wings (Figs. 5B; 6B). The primary determinant of this increase in  $f_{tot}^b$  is the greater  $f_{trans}^b$  (Fig. 6B). While  
580 different in average and peak magnitude, the pattern of the  $f_{trans}^b$  (as well as the rotational and added mass  
581 forces) throughout the wing stroke was generally similar in both wing shape cases (Fig 6B; Table 3). The  
582 small interspecific differences that exist in the shape of  $f_x^b$  and  $f_z^b$  during the second half of wing stroke (Fig.  
583 5B) occur because the magnitude of the translational force component of *A. luna* shaped wings is decreased  
584 relative to the magnitude of the added mass and rotational force components (Fig. 6B). The increase in  
585 the relative contribution of  $f_{rot}^b$  and  $f_{adm}^b$  in *A. luna* is responsible for the interspecific differences in the  
586 shape of  $f_x^b$  and  $f_z^b$  during the second half of wing stroke (Figs. 5B, 6B).

587 **Wing kinematics:** The most apparent interspecific difference in aerodynamics due to kinematics alone (Model  
588 3) is that *A. luna* produces much lower overall forces than *E. achemon* (Fig. 5C). The reduction in total  
589 body forces is again determined primarily by differences in translational force (Fig. 6C). The main cause of  
590 this difference is that  $n$ , and hence wing velocity, of *E. achemon* is 2.2 times greater than *A. luna* (Table 2.  
591 Interspecific differences in kinematics are also responsible for interspecific differences in the sign of  $f_x^b$  and  
592  $f_z^b$  in Model 1 during the first half and second half of wing stroke, respectively (Fig. 5A). To break this

593 down further, we separated the contributions of stroke plane angle ( $\beta$ ), wing angles ( $\phi$ ,  $\theta$ , and  $\alpha$ ) and  $n$   
594 (Fig. S3). The interspecific sign flip in  $f_z^b$  (Fig. 5A) occurs due to a combination of stroke plane angle and  
595 angle of attack (Fig. S3A), and the  $f_x^b$  sign flip (Fig. 5A) occurs primarily from the more vertical stroke  
596 plane (larger  $\beta$ ) of *A. luna* (Fig. S3C).

597 **Wing size:** *A. luna* has larger wings and, if all other variables are equal (Model 4), it is not surprising that  
598 *A. luna* produces larger overall forces (Figs. 5D, 6D). As before, differences in total force are primarily due  
599 to differences in the translational force (Fig. 6D). However, the magnitude of the rotational and added  
600 mass components of  $f_x^b$ ,  $f_y^b$ , and  $f_z^b$  are also nearly an order of magnitude larger in *A. luna* sized wings  
601 compared to *E. achemon* (Fig. 6D). Overall, wing size has the predictable effect of scaling all of the  
602 force components. Taken together, the three knobs (shape, kinematics, and size) that evolution can tinker  
603 with means that even though the wing shapes are quite distinct between hawkmoths and silkmoths, these  
604 differences converge on similar overall wingstroke averaged forces (but different within wing stroke patterns)  
605 from different combinations of morphology and kinematics.

## 606 DISCUSSION

607 Wing shape can have a strong influence on the aerodynamics and maneuverability of flying animals. The  
608 first goal of this study was to test if hawkmoths and silkmoths diverged significantly in wing shape across the  
609 moth superfamily Bombycoidea. We find that early in the evolutionary history of Bombycoidea, wing shape  
610 was generally conserved until the ancestors of the hawkmoth and silkmoth sister clades rapidly separated in  
611 morphospace (Fig. 2C). The evolutionary split between these two families has been dated to occur between  
612 57 and 75 MYA (Kawahara et al., 2019), suggesting that these wing shape trajectories have been evolving  
613 since then.

614 The distinct trajectory in wing shape change between hawkmoths and silkmoths was followed by a  
615 subsequent shape diversification within each group. Even specific species within each group that subsequently  
616 converged in life history did not fully converge to employ overlapping wing shapes. For example, while the  
617 majority of adult hawkmoths are known for their hovering nectaring behavior, members of the hawkmoth  
618 subfamily, Smerinthinae (Node 67; Figs. S1B, 2A), have lost the ability to feed as adults (Tuskes et al.,  
619 1996), convergent with all species of silkmoth. However, the wing shape of Smerinthinae species remains  
620 divergent with silkmoths with the exception of *Andriasa contraria* (Taxon 8). While we chose species  
621 to broadly cover the groups within bombycoids, sampling is far from complete. Therefore, we remain  
622 conservative in our interpretation, focusing on the split between hawkmoths and silkmoths for which we  
623 were able to accumulate broad sampling for our analysis. In sum, these data provide phylogenetic evidence  
624 supporting our hypothesis that there have been distinct wing shape trajectories in these two groups of

625 bombycoids.

626 **Silkmoth wing shapes are more favorable to maneuverability than hawkmoths.** The evolution of forewing  
627 shape does not support hypotheses based on the presumed maneuverability of hawkmoths. We find that  
628 hawkmoths employ wings of high AR,  $W_s$ , and  $\hat{r}_2$ ; all metrics typically associated with low degrees of  
629 maneuverability. In contrast, we find that silkmoths are employing wings of low AR,  $W_s$ , and  $\hat{r}_2$ ; all metrics  
630 typically associated with higher degrees of maneuverability. However, these relationships between wing  
631 shape and maneuverability are typically used in fixed wing aircraft theory or when the kinematics of the  
632 flapping wing are held constant. In species employing flapping flight, wing shape and movement could  
633 undergo correlated evolution to produce species-specific performance metrics that could not be predicted by  
634 either wing shape or movement alone.

635 **The high aspect ratio wings of hawkmoths and larger wing stroke amplitude of silkmoths lead to similar**  
636 **induced power requirements.** In comparison to silkmoths, hawkmoths evolved high AR wings (Figs. 2,  
637 3; Table 1) which might reduce maneuverability; however, high AR also reduce the induced power ( $P_{\text{ind}}$ )  
638 requirements of flight (Norberg and Rayner, 1987; Pennycuick, 1968).  $P_{\text{ind}}$  is the power required to overcome  
639 induced drag on the wing and impart sufficient downwards momentum to the surrounding air to offset body  
640 weight. The reduced maneuverability of high AR wings is due to an increase in the moments of inertia of  
641 the wing pair (Betts and Wootton, 1988), but the hawkmoth AR increase is concomitant with a reduction  
642 in wing area. Hawkmoths have evolved high AR by reducing mean chord length,  $\bar{c}$ , rather than through  
643 an increase in wing span,  $R$  (Table 1; Fig 2B). Therefore, while selection for economical flight (increased  
644 AR) might often reduce maneuverability, the evolution of short, high AR wings in hawkmoths (achieved  
645 through a reduction in  $\bar{c}$ ) could act to increase economy while not necessarily sacrificing maneuverability.  
646 The potential cost is that proportionally smaller wings could reduce wing stroke-averaged aerodynamic  
647 force production, if wing movement remains constant. However, our aerodynamic model (Figs. 5A; 6A)  
648 reveals that the changes in wing kinematics, and particularly the higher wingbeat frequencies of hawkmoths,  
649 result in very similar wing stroke averaged forces between *E. achemon* and *A. luna*.

650 Despite employing lower AR wings, the representative silkmoth, *A. luna*, does not have a greater  
651 induced power ( $P_{\text{ind}}$ ) requirement than the representative hawkmoth, *E. achemon*. The higher AR wings of  
652 hawkmoths leads to the prediction that hawkmoths would require less  $P_{\text{ind}}$  than silkmoths (Pennycuick,  
653 1968). However,  $P_{\text{ind}}$  required for flight is also inversely proportional to both  $R$  and wing stroke amplitude  
654 ( $\phi_{\text{p-p}}$ ). The kinematics from our two representative species show that the silkmoth (*A. luna*) employs a  
655 greater  $\phi_{\text{p-p}}$  in comparison to the hawkmoth (*E. achemon*) (Fig. 4; Table 2). The net effect of AR,  $R$ ,  
656 and  $\phi_{\text{p-p}}$  is that there is little difference in the  $P_{\text{ind}}$  requirement between these two species, with *A. luna*

657 actually being somewhat lower.

658 The employment of smaller, high AR wings by hawkmoths and the production of a large amplitude  
659 wingstrokes by silkmoths are two different strategies that can act to reduce the  $P_{\text{ind}}$  requirements of flight.  
660 Many hawkmoth species are known for their ability to sustain long duration bouts of hovering, often  
661 associated with nectaring from flowers (Sprayberry and Daniel, 2007; Wasserthal, 1993, 1998), which require  
662 a high-power output. In contrast, all silkmoths employ rudimentary mouth parts and do not feed as adults  
663 (Janzen, 1984; Tuskes et al., 1996). Therefore, in hawkmoths, the selective pressure to reduce power while  
664 not sacrificing maneuverability has likely driven the evolution of short, high AR wings used at a high  $n$ . In  
665 silkmoths, the selective pressure to increase lifespan (endurance) has likely driven the evolution of large  
666 wing beat amplitudes used at a low  $n$ . Kinematic differences (particularly  $n$  and  $\phi_{\text{p-p}}$ ) parallel the broader  
667 clade specific wing shape differences in AR. Hawkmoths and silkmoths have therefore evolved different  
668 strategies to reduce  $P_{\text{ind}}$ .

669 While  $P_{\text{ind}}$  is one of three components of the total aerodynamic power requirement, at slower flight speeds,  
670 which were employed by our exemplar species, the majority of the total aerodynamic cost in *Manduca*  
671 *sexta*, a species of hawkmoth, is from  $P_{\text{ind}}$  (Willmott and Ellington, 1997b). Inertial power requirements  
672 are similar between our exemplar species and the similar body size between the exemplar species suggests  
673 similar parasitic power requirements. The difference in wing area between our exemplar species does suggest,  
674 however, that *A. luna* will incur greater profile power costs in comparison to *E. achemon*. However, we  
675 suggest that the reduced  $P_{\text{ind}}$  of *A. luna* in comparison *E. achemon* ultimately leads to similar overall  
676 aerodynamic power requirements between the two species.

677 **Hig wing beat frequency might act to offset high wing loading ( $W_s$ ) in hawkmoths.** The lower  $W_s$  of  
678 silkmoths suggests they are more maneuverable than hawkmoths, but, as before, this assumes all other  
679 things are equal. The reduced  $W_s$  of silkmoths comes primarily from a larger  $S$  rather than smaller body  
680 size compared to hawkmoths (Table 1). Higher  $W_s$  reduces mass-specific wing-stroke averaged forces.  
681 However, many species use increased flight speeds or high  $n$  to offset a high  $W_s$  in terms of aerodynamic  
682 force production (Ahmad, 1984; Byrne et al., 1988). Therefore, one selective pressure that could have led  
683 to the evolution of a higher  $n$  in hawkmoths is the need to offset the greater magnitude of  $W_s$  relative to  
684 silkmoths and other bombycoid families.

685 **The greater radius of second moment of area ( $\hat{r}_2$ ) of hawkmoths can augment force production.** The  
686 high  $\hat{r}_2$  of hawkmoth wings again suggests that silkmoths should be more maneuverable than hawkmoths  
687 (Le Roy et al., 2019; Ellington, 1984a). For a wing of uniform thickness and density, larger  $\hat{r}_2$  means more  
688 mass is concentrated distally along the wingspan, corresponding to an increase in moments of inertia. In

689 fixed wing aircrafts, larger wing moments of inertia hinder yaw and roll maneuvers (Etkin and Reid, 1996).  
690 However, in flapping or revolving wings, when all other things are equal, the larger  $\hat{r}_2$  of hawkmoths would  
691 also increase their magnitude of torque production relative to silkmoths. The velocity of a wing section  
692 increases with its distance from the axis of rotation, and aerodynamic force production is proportional to  
693 velocity squared. Shifting more area distally (increasing  $\hat{r}_2$ ) means more of the wing is moving at higher  
694 speeds enhancing production of aerodynamic forces and torques (e.g. Muijres et al. (2017); Fernandez et al.  
695 (2017)).

696 We can see this pattern when comparing aerodynamic force production between our representative  
697 hawkmoth (*E. achemon*) and silkmoth (*A. luna*) species. In Model 2, where wing area and all kinematic  
698 parameters are equal between species, the  $f_x^b$ ,  $f_y^b$ , and  $f_z^b$  traces follow similar trajectories across the wing  
699 stroke and the magnitude of every force is greater in *E. achemon* shaped wings than in *A. luna* shaped  
700 wings (Fig. 5B; 6B).

701 **Large, slow wings might produce bobbing flight in silkmoths.** We find that the complex interaction  
702 between wing shape, size, and kinematics are tightly linked to produce the within wingstroke aerodynamic  
703 forces of *A. luna* and *E. achemon* (Figs. 5A, 6A), and might contribute to the differences in flight behavior  
704 between the families. *A. luna* has more variation in forces during the wingstroke even though it produces  
705 approximately the same average force as *E. achemon*. This is especially noticeable in the switch from  
706 negative  $f_z^b$  to positive during the wingstroke in *A. luna*. Large force fluctuations and asymmetry (Figs.  
707 5A, 6A) should lead to greater fluctuation in body vertical velocity and are likely the source of the bobbing,  
708 erratic motions that are characteristic of silkmoths and may be useful in predator avoidance.

709 **Evolution of high wing beat frequency ( $n$ ) enables hawkmoth maneuverability with wing shape to reduce**  
710 **power.** The evolution of  $n$  parallels the divergence of wing shape between hawkmoths and silkmoths. High  
711  $n$  may be the key to conducting high speed maneuvers in small flapping flyers like hawkmoths. Although  
712 hawkmoths have not evolved forewing shapes thought to be advantageous for maneuverability, it is clear  
713 that hawkmoths have evolved a means to accomplish rapid maneuvers while foraging (Wasserthal, 1993;  
714 Sponberg et al., 2015; Stöckl et al., 2017a). As opposed to fixed-wing cases, maneuverability of flapping  
715 flight relies on the generation of aerodynamic forces from wing movement to initiate directional change  
716 (Warrick et al., 1998). Therefore, an increase in  $n$  would allow for more frequent modification of force vectors,  
717 which could increase maneuverability. Further, increasing  $n$  will also enhance maneuverability by increasing  
718 the force and torque produced by a wing of similar shape and area (Hedrick et al., 2009), which is also  
719 exemplified in Model 3 of this study (Fig. 5C). The diversification of  $n$  could therefore contribute to  
720 interspecific variation in flight control and maneuverability across species. Although  $n$  was inferred from



721 scaling in this study, the estimate closely matches the observed frequency of the species considered here that  
722 have a known  $n$ . To the best that we can assess,  $n$  has strongly diverged between hawkmoths and silkmoths,  
723 and mean  $n$  is nearly double for a hawkmoth in comparison to a silkmoth of similar body size (Table 1, 2).  
724 Therefore, we suggest that high  $n$  is one of the aspects of flight control that evolved in hawkmoths allowing  
725 for the completion of high frequency maneuvers while employing wings of high AR,  $W_s$ , and  $\hat{r}_2$ .

726 **Two strategies for agile flight.** Silkmoths and hawkmoths have evolved two distinct strategies for agile  
727 flapping flight. Species of both families have evolved mechanisms for maneuverability and power reduction,  
728 but have distinctly different wing shapes. Hawkmoths achieve maneuverability through high  $n$  (movement)  
729 and reduce power by employing wings of high AR (shape), while silkmoths achieve maneuverability  
730 through favorable wing shapes and a reduction of power through the production of high amplitude wing  
731 strokes. The evolutionary trajectories of forewing shape have diverged between the two families, but the  
732 distinct flight strategies arise in part due to how differently they use their wings. The metrics of forewing  
733 shape, historically derived for fixed-winged aircraft, are not consistent with initial expectations of flight  
734 maneuverability based on the life history of species in each clade. Instead, we find that aerodynamic  
735 performance emerges from the interaction of wing shape, size, and movement (kinematics), demonstrating  
736 an example of parallel evolution between the components of a complex locomotor system (Aiello et al., 2017).  
737 The ability for natural selection to act both on wing shape and movement to impact the power requirements  
738 and maneuverability of an animal demonstrates the potential decoupling of animal locomotor performance  
739 metrics. The employment of flapping flight therefore provides the flexibility to tune aerodynamics through  
740 kinematics. Thus, we suggest the complex interplay between wing shape, size, and movement in resultant  
741 performance reduces morphological constraints that would drive the convergent evolution of wings to meet  
742 one or few advantageous shapes, leading to the diversity of wing shapes seen across extant aerial animals.

743 **ACKNOWLEDGMENTS**

744 We thank Jesse Barber, Stephanie Gage, Jeff Gau, Megan Matthews, Izaak Neveln, David Plotkin, Joy  
 745 Putney, Juliette Rubin, Varun Sharma, Ryan St Laurent, and Travis Tune for helpful discussions, Aaron  
 746 Olsen for assistance with image digitization and analysis, Milton Tan, Talia Moore, and Sarah Friedman for  
 747 advice on phylogenetic methods, Bo Cheng and Yagiz Bayiz for advice on the aerodynamic blade element  
 748 model, and Laurel Kaminsky for assistance in imaging museum specimens.

749 **FUNDING**

750 This work was supported by the National Science Foundation under a Postdoctoral Research Fellowships  
 751 in Biology DBI #1812107 to B.R.A., a Faculty Early Career Development Award #1554790 to S.S., and  
 752 grants DBI #1349345, DEB #1557007, and IOS #1920895 to A.Y.K., and a Dunn Family Professorship to  
 753 S.S.

754 **APPENDIX**

**Table A.1. List of symbols in the alphabetical order.**

| Symbol                         | Definition                                                                                                  |
|--------------------------------|-------------------------------------------------------------------------------------------------------------|
| A.B.                           | ancient bombycoids                                                                                          |
| $AR = R^2/S$                   | aspect ratio                                                                                                |
| $(a_{\phi,k}, b_{\phi,k})$     | Fourier series coefficients of Fourier fits of $\phi$                                                       |
| $(a_{\theta,k}, b_{\theta,k})$ | Fourier series coefficients of Fourier fits of $\theta$                                                     |
| $(a_{\alpha,k}, b_{\alpha,k})$ | Fourier series coefficients of Fourier fits of $\alpha$                                                     |
| $\hat{\mathbf{b}}$             | trailing edge to leading edge unit vector                                                                   |
| $C_D$                          | aerodynamic coefficient of the drag force                                                                   |
| $C_L$                          | aerodynamic coefficient of the lift force                                                                   |
| $C_R$                          | coefficient of the rotational aerodynamic force                                                             |
| $c$                            | chord length                                                                                                |
| $\bar{c}$                      | Mean chordwise wing length                                                                                  |
| $d$                            | distance between the wing-attached $y$ -axis (wing-pitching axis)<br>and the quarter-chord line on the wing |
| $dr$                           | width of an infinitesimal blade element strip                                                               |
| $e$                            | distance between the leading edge and the wing-pitching axis                                                |

| Continuation of Table A.1                                                                                                           |                                                                                                       |
|-------------------------------------------------------------------------------------------------------------------------------------|-------------------------------------------------------------------------------------------------------|
| Symbol                                                                                                                              | Definition                                                                                            |
| $\mathbf{f} = \begin{bmatrix} f_x \\ f_y \\ f_z \end{bmatrix}$                                                                      | force vector                                                                                          |
| $\mathbf{f}_{\text{tra}}$                                                                                                           | translational aerodynamic force vector                                                                |
| $\mathbf{f}_{\text{D}}$                                                                                                             | drag component vector of the translational aerodynamic force                                          |
| $\hat{\mathbf{f}}_{\text{D}}$                                                                                                       | drag component unit vector of the translational aerodynamic force                                     |
| $\mathbf{f}_{\text{L}}$                                                                                                             | lift component vector of the translational aerodynamic force                                          |
| $\hat{\mathbf{f}}_{\text{L}}$                                                                                                       | lift component unit vector of the translational aerodynamic force                                     |
| $\mathbf{f}_{\text{rot}}$                                                                                                           | rotational aerodynamic force vector                                                                   |
| $\mathbf{f}_{\text{adm}}$                                                                                                           | aerodynamic force vector due to the added mass                                                        |
| $\mathbf{f}_{\text{right}}$                                                                                                         | vector of the total aerodynamic force on right wing                                                   |
| $h$                                                                                                                                 | distance between the wing-attached $y$ -axis (wing-pitching axis) and the half-chord line on the wing |
| $\mathbf{I} = \begin{bmatrix} I_{xx} & -I_{xy} & -I_{xz} \\ -I_{xy} & I_{yy} & -I_{yz} \\ -I_{xz} & -I_{yz} & I_{zz} \end{bmatrix}$ | body's moment of inertia tensor                                                                       |
| $\mathbf{l}_1$                                                                                                                      | position vector from body center of mass to the wing hinge point                                      |
| $l_{\text{b}}$                                                                                                                      | body length                                                                                           |
| $l_{\text{abd}}$                                                                                                                    | abdomen length                                                                                        |
| $\hat{l}_{\text{abd}} = l_{\text{abd}}/l_{\text{b}}$                                                                                | fraction of body length occupied by abdomen                                                           |
| $\hat{l}_{\text{tho}} = l_{\text{tho}}/l_{\text{b}}$                                                                                | fraction of body length occupied by thorax                                                            |
| MYA                                                                                                                                 | million years ago                                                                                     |
| $\mathbf{M}_{\text{tra}}$                                                                                                           | translational aerodynamic moment pseudovector                                                         |
| $\mathbf{M}_{\text{rot}}$                                                                                                           | rotational aerodynamic moment pseudovector                                                            |
| $\mathbf{M}_{\text{adm}}$                                                                                                           | aerodynamic moment pseudovector due to added-mass force                                               |
| $\mathbf{M}_{\text{right}}$                                                                                                         | total aerodynamic moment pseudovector of right wing                                                   |
| $m_{\text{b}}$                                                                                                                      | body mass                                                                                             |
| $m_{\text{w}}$                                                                                                                      | wing mass                                                                                             |
| $m_{\text{t}} = m_{\text{b}} + 2m_{\text{w}}$                                                                                       | Total (body+wings) mass                                                                               |
| $n$                                                                                                                                 | wingbeat frequency                                                                                    |

| Continuation of Table A.1                                                               |                                                                                                    |
|-----------------------------------------------------------------------------------------|----------------------------------------------------------------------------------------------------|
| Symbol                                                                                  | Definition                                                                                         |
| $n = 187m_t^{0.3}S^{-0.7}$                                                              | wingbeat frequency                                                                                 |
| $\hat{n}$                                                                               | unit vector normal to the dorsal surface of the wing                                               |
| $P_{\text{pro}} = \frac{1}{T} \int_0^T \int_0^R \frac{1}{2} C_D \rho c v^3 dr dt / m_t$ | body mass-specific mean profile power                                                              |
| $P_{\text{ind}} = w(m_t g - f_{D,z}) / m_t$                                             | body mass-specific mean induced power                                                              |
| $P_{\text{acc}} = 8\pi^2 \phi_{\text{p-p}}^2 n^2 R^2 \hat{r}_2 m_w / m_t$               | body mass-specific mean inertial power                                                             |
| pPC $n$                                                                                 | $n^{\text{th}}$ axis of the phylogenetic principal components                                      |
| $\mathbf{R}_z(\phi)$                                                                    | transformation matrix for rotation of $\phi$ radians about the $z$ -axis                           |
| $\mathbf{R}_x(\theta)$                                                                  | transformation matrix for rotation of $\theta$ radians about the $x$ -axis                         |
| $\mathbf{R}_y(\beta)$                                                                   | transformation matrix for rotation of $\beta$ radians about the $y$ -axis                          |
| $\mathbf{R}_w^b$                                                                        | transformation matrix for rotating the coordinate system from wing-attached to body-attached frame |
| $R$                                                                                     | spanwise wing length                                                                               |
| $\mathbf{r}_{\text{cm}}$                                                                | position vector from the body center of mass to a blade element strip of the wing                  |
| $\mathbf{r}_{\text{wh}}$                                                                | position vector from the wing hinge to a blade element strip of the wing                           |
| $r$                                                                                     | distance of a blade element wing strip from the wing hinge along the $y^w$ axis                    |
| $\mathbf{r}_3$                                                                          | position vector from body center of mass to the quarter-chord line on a blade-element wing strip   |
| $\mathbf{r}_1$                                                                          | position vector from body center of mass to the half-chord line on a blade-element wing strip      |
| $\hat{r}_2 = \sqrt{\int_0^1 \hat{c} \hat{r}^2 d\hat{r}}$                                | nondimensional radius of second moment of area                                                     |
| $S$                                                                                     | wing area                                                                                          |
| $T = 1/n$                                                                               | wingbeat time period                                                                               |
| $t$                                                                                     | time variable during a wingstroke, where $t = 0$ corresponds to the start of the downstroke        |
| $v$                                                                                     | relative airflow speed                                                                             |
| $\mathbf{v}$                                                                            | relative airflow velocity vector                                                                   |
| $\hat{v}$                                                                               | relative airflow velocity unit vector                                                              |
| $\mathbf{v}_b$                                                                          | body linear velocity vector                                                                        |

| Continuation of Table A.1 |                                                                                                          |
|---------------------------|----------------------------------------------------------------------------------------------------------|
| Symbol                    | Definition                                                                                               |
| $W_s = m_t/S$             | wing loading                                                                                             |
| $w_0$                     | induced airflow speed                                                                                    |
| $x^b y^b z^b$             | body-attached coordinate frame                                                                           |
| $x^l y^l z^l$             | body-long coordinate frame                                                                               |
| $x^{sp} y^{sp} z^{sp}$    | stroke-plane coordinate frame                                                                            |
| $x^w y^w z^w$             | wing-attached coordinate frame                                                                           |
| $\hat{y}^w$               | unit vector along the wing-attached $y$ -axis (wing-pitching axis)                                       |
| $\alpha$                  | wing pitching angle (feathering angle)                                                                   |
| $\dot{\alpha}$            | wing pitching angular velocity                                                                           |
| $\alpha_{p-p}$            | peak-to-peak amplitude of the feathering angle                                                           |
| $\bar{\alpha}$            | mean feathering angle                                                                                    |
| $\alpha_e$                | effective angle of attack                                                                                |
| $\alpha_r$                | effective angle of attack bound between 0 and 90°                                                        |
| $\beta$                   | stroke-plane angle                                                                                       |
| $\theta$                  | stroke deviation angle                                                                                   |
| $\dot{\theta}$            | stroke deviation angular velocity                                                                        |
| $\theta_{p-p}$            | peak-to-peak deviation angle                                                                             |
| $\bar{\theta}$            | mean deviation angle                                                                                     |
| $\rho$                    | density of air                                                                                           |
| $\phi$                    | stroke positional angle (sweep angle)                                                                    |
| $\dot{\phi}$              | stroke positional angular velocity                                                                       |
| $\phi_{p-p}$              | peak-to-peak amplitude of the stroke positional (sweep) angle                                            |
| $\bar{\phi}$              | mean sweep angle                                                                                         |
| $\chi$                    | body angle                                                                                               |
| $\chi_1$                  | angle of inclination of the wing hinge from the center of mass with respect to the body-long $xy$ -plane |
| $\chi_e$                  | angle of inclination of the wing hinge from the center of mass with respect to the horizontal plane      |
| $\omega_w$                | wing angular velocity pseudovector due to wing kinematic motion                                          |
| $\omega_b$                | body angular velocity pseudovector                                                                       |

| Continuation of Table <a href="#">A.1</a> |                                                             |
|-------------------------------------------|-------------------------------------------------------------|
| Symbol                                    | Definition                                                  |
| Superscripts:                             |                                                             |
| b                                         | measured with respect to the body-attached coordinate frame |
| <i>l</i>                                  | measured with respect to the body-long frame                |
| sp                                        | measured with respect to the stroke-plane frame             |
| w                                         | measured with respect to the wing-attached coordinate frame |

## REFERENCES

- Ahmad, A. (1984). A comparative study on flight surface and aerodynamic parameters of insects, birds and bats. *Indian J Exp Biol* **22**, 270–278.
- Aiello, B. R., Westneat, M. W. and Hale, M. E. (2017). Mechanosensation is evolutionarily tuned to locomotor mechanics. *Proc Natl Acad Sci U S A* **14**, 4459–4464.
- Aldridge, H. D. J. N. (1987). Turning Flight of Bats. *Journal of Experimental Biology* **128**, 419–425.
- Baliga, V. B., Szabo, I. and Altshuler, D. L. (2019). Range of motion in the avian wing is strongly associated with flight behavior and body mass. *Science Advances* **5**.
- Barber, J. R., Leavell, B. C., Keener, A. L., Breinholt, J. W., Chadwell, B. A., McClure, C. J. W., Hill, G. M. and Kawahara, A. Y. (2015). Moth tails divert bat attack: Evolution of acoustic deflection. *Proceedings of the National Academy of Sciences of the United States of America* **112**, 2812–2816.
- Berman, G. J. and Wang, Z. J. (2007). Energy-minimizing kinematics in hovering insect flight. *Journal of Fluid Mechanics* **582**, 153–168.
- Berwaerts, K., Van Dyck, H. and Aerts, P. (2002). Does flight morphology relate to flight performance? An experimental test with the butterfly *Pararge aegeria*. *Functional Ecology* **16**, 484–491.
- Betts, C. R. and Wootton, R. J. (1988). Wing Shape and Flight Behavior in Butterflies (Lepidoptera, Papilionoidea and Hesperioidea) - a Preliminary-Analysis. *Journal of Experimental Biology* **138**, 271–288.
- Breinholt, J. W., Earl, C., Lemmon, A. R., Lemmon, E. M., Xiao, L. and Kawahara, A. Y. (2018). Resolving Relationships among the Megadiverse Butterflies and Moths with a Novel Pipeline for Anchored Phylogenomics. *Systematic Biology* **67**, 78–93.
- Burns, J. G. and Ydenberg, R. C. (2002). The effects of wing loading and gender on the escape flights of least sandpipers (*Calidris minutilla*) and western sandpipers (*Calidris mauri*). *Behavioral Ecology and Sociobiology* **52**, 128–136.
- Byrne, D. N., Buchmann, S. L. and Spangler, H. G. (1988). Relationship between Wing Loading, Wingbeat Frequency and Body-Mass in Homopterous Insects. *Journal of Experimental Biology* **135**, 9–23.
- Callahan, P. S. (1965). A Photoelectric-Photographic Analysis of Flight Behavior in the Corn Earworm, *Heliothis zea*, and Other Moths. *Annals of the Entomological Society of America* **58**, 159–169.
- Céspedes, A., Penz, C. M. and DeVries, P. J. (2015). Cruising the rain forest floor: butterfly wing shape evolution and gliding in ground effect. *Journal of Animal Ecology* **84**, 808–816.
- Cheng, B., Deng, X. Y. and Hedrick, T. L. (2011). The mechanics and control of pitching manoeuvres in a freely flying hawkmoth (*Manduca sexta*). *Journal of Experimental Biology* **214**, 4092–4106.
- Cheng, B., Tobalske, B. W., Powers, D. R., Hedrick, T. L., Wang, Y., Wethington, S. M., Chiu, G. T. C. and Deng, X. Y. (2016a). Flight mechanics and control of escape manoeuvres in hummingbirds. II. Aerodynamic force production, flight control and performance limitations. *Journal of Experimental Biology* **219**, 3532–3543.
- Cheng, B., Tobalske, B. W., Powers, D. R., Hedrick, T. L., Wethington, S. M., Chiu, G. T. C. and Deng, X. Y. (2016b). Flight mechanics and control of escape manoeuvres in hummingbirds. I. Flight kinematics. *Journal of Experimental Biology* **219**, 3518–3531.
- Cho, S., Epstein, S. W., Mitter, K., Hamilton, C. A., Plotkin, D., Mitter, C. and Kawahara, A. Y. (2016). Preserving and vouchering butterflies and moths for large-scale museum-based molecular research. *PeerJ* **4**.
- Crandell, K. E. and Tobalske, B. W. (2011). Aerodynamics of tip-reversal upstroke in a revolving pigeon wing. *Journal of Experimental Biology* **214**, 1867–1873.
- Dakin, R., Segre, P. S., Straw, A. D. and Altshuler, D. L. (2018). Morphology, muscle capacity, skill, and maneuvering ability in hummingbirds. *Science* **359**, 653–657.
- Deakin, M. A. B. (2010). Formulae for insect wingbeat frequency. *Journal of Insect Science* **10**.
- DeVries, P. J., Penz, C. M. and Hill, R. I. (2010). Vertical distribution, flight behaviour and evolution of wing morphology in *Morpho* butterflies. *Journal of Animal Ecology* **79**, 1077–1085.
- Dudley, R. (2000). *The biomechanics of insect flight: form, function, evolution*. Princeton University Press, 476 pp.
- Dudley, R. (2002). Mechanisms and implications of animal flight maneuverability. *Integr Comp Biol* **42**, 135–140.
- Dudley, R. and Srygley, R. B. (1994). Plight Physiology of Neotropical Butterflies - Allometry of Airspeeds during Natural Free-Flight. *Journal of Experimental Biology* **191**, 125–139.
- Ellington, C. P. (1984a). The Aerodynamics of Hovering Insect Flight 2. Morphological Parameters. *Philosophical Transactions of the Royal Society of London Series B-Biological Sciences* **305**, 17–40.
- Ellington, C. P. (1984b). The Aerodynamics of Hovering Insect Flight 4. Aerodynamic Mechanisms. *Philosophical Transactions of the Royal Society of London Series B-Biological Sciences* **305**, 41–78.
- Ellington, C. P. (1984c). The Aerodynamics of Hovering Insect Flight 6. Lift and Power Requirements. *Philosophical Transactions of the Royal Society of London Series B-Biological Sciences* **305**, 145–181.
- Ellington, C. P., VandenBerg, C., Willmott, A. P. and Thomas, A. L. R. (1996). Leading-edge vortices in insect flight. *Nature* **384**, 626–630.
- Etkin, B. and Reid, L. D. (1996). *Dynamics of flight: stability and control*. New York: Wiley, third edition edition.
- Farina, W. M., Varju, D. and Zhou, Y. (1994). The Regulation of Distance to Dummy Flowers during Hovering Flight in the Hawk Moth *Macroglossum-stellatarum*. *Journal of Comparative Physiology a-Sensory Neural and Behavioral Physiology* **174**, 239–247.
- Faruque, I. and Humbert, J. S. (2010a). Dipteran insect flight dynamics. Part 1 Longitudinal motion about hover. *J Theor Biol* **264**, 538–552.
- Faruque, I. and Humbert, J. S. (2010b). Dipteran insect flight dynamics. Part 2: Lateral-directional motion about hover. *J Theor Biol* **265**, 306–313.
- Felsenstein, J. (1985). Phylogenies and the Comparative Method. *American Naturalist* **125**, 1–15.
- Fernandez, M. J., Driver, M. E. and Hedrick, T. L. (2017). Asymmetry costs: effects of wing damage on hovering flight performance in the hawkmoth *Manduca sexta*. *Journal of Experimental Biology* **220**, 3649–3656.
- Fung, Y. C. (1969). *An introduction to the theory of aeroelasticity*. New York: Dover.
- Gage, S. L., Daly, K. C. and Nighorn, A. (2013). Nitric oxide affects short-term olfactory memory in the antennal lobe of *Manduca sexta*. *Journal of Experimental Biology* **216**, 3294–3300.
- Gilchrist, G. W. (1990). The Consequences of Sexual Dimorphism in Body Size for Butterfly Flight and Thermoregulation. *Functional Ecology* **4**, 475–487.
- Hamilton, C. A., St Laurent, R. A., Dexter, K., Kitching, I. J., Breinholt, J. W., Zwick, A., Timmermans, M., Barber, J. R. and Kawahara, A. Y. (2019). Phylogenomics resolves major relationships and reveals significant diversification rate shifts in the evolution of silk moths and relatives. *BMC Evol Biol* **19**, 182.
- Han, J. S., Kim, J. K., Chang, J. W. and Han, J. H. (2015). An improved quasi-steady aerodynamic model for insect wings that considers movement of the center of pressure. *Bioinspiration and Biomimetics* **10**.
- Hedenstrom, A. and Rosen, M. (2001). Predator versus prey: on aerial hunting and escape strategies in birds. *Behavioral Ecology* **12**, 150–156.
- Hedrick, T. L., Cheng, B. and Deng, X. (2009). Wingbeat time and the scaling of passive rotational damping in flapping flight. *Science* **324**, 252–255.

- Hedrick, T. L. and Daniel, T. L. (2006). Flight control in the hawkmoth *Manduca sexta*: the inverse problem of hovering. *Journal of Experimental Biology* **209**, 3114–3130.
- Hildebrand, J. G. (1996). Olfactory control of behavior in moths: central processing of odor information and the functional significance of olfactory glomeruli. *Journal of Comparative Physiology a-Neuroethology Sensory Neural and Behavioral Physiology* **178**, 5–19.
- Jacobs, D. S. and Bastian, A. (2016). *Predator-prey interactions: co-evolution between bats and their prey*. Cham, Switzerland: Springer.
- Janzen, D. H. (1984). Two ways to be a tropical big moth: Santa Rosa saturniids and sphingids. In *Oxford surveys in evolutionary biology* (ed. D. R. R. M), pp. 85–140. Oxford: Oxford University Press.
- Kawahara, A. Y. and Barber, J. R. (2015). Tempo and mode of antibat ultrasound production and sonar jamming in the diverse hawkmoth radiation. *Proceedings of the National Academy of Sciences of the United States of America* **112**, 6407–6412.
- Kawahara, A. Y., Plotkin, D., Espeland, M., Meusemann, K., Toussaint, E. F. A., Donath, A., Gimmich, F., Frandsen, P. B., Zwick, A., dos Reis, M. et al. (2019). Phylogenomics reveals the evolutionary timing and pattern of butterflies and moths. *Proceedings of the National Academy of Sciences of the United States of America* **116**, 22657–22663.
- Kim, J.-K. and Han, J.-H. (2014). A multibody approach for 6-DOF flight dynamics and stability analysis of the hawkmoth *Manduca sexta*. *Bioinspiration & Biomimetics* **9**, 16011.
- Kim, J.-K., Han, J.-S., Lee, J.-S. and Han, J.-H. (2015). Hovering and forward flight of the hawkmoth *Manduca sexta*: trim search and 6-DOF dynamic stability characterization. *Bioinspiration & Biomimetics* **10**, 56012.
- Kitching, I. J., Rougerie, R., Zwick, A., Hamilton, C. A., St Laurent, R. A., Naumann, S., Mejia, L. B. and Kawahara, A. Y. (2018). A global checklist of the Bombycoidea (Insecta: Lepidoptera). *Biodiversity Data Journal* **6**.
- Knorlein, B. J., Baier, D. B., Gatesy, S. M., Laurence-Chasen, J. D. and Brainerd, E. L. (2016). Validation of XMLab software for marker-based XROMM. *Journal of Experimental Biology* **219**, 3701–3711.
- Kueck, P. and Longo, G. C. (2014). FASconCAT-G: extensive functions for multiple sequence alignment preparations concerning phylogenetic studies. *Frontiers in Zoology* **11**.
- Larsson, A. (2014). AliView: a fast and lightweight alignment viewer and editor for large datasets. *Bioinformatics* **30**, 3276–3278.
- Le Roy, C., Debat, V. and Llaurens, V. (2019). Adaptive evolution of butterfly wing shape: from morphology to behaviour. *Biological Reviews* **94**, 1261–1281.
- Lemaire, C. and Minet, J. (1998). The Bombycoidea and their relatives. In *Handbook of Zoology, Volume IV, Arthropoda: Insecta* (ed. N. P. Kristensen), pp. 321–353. Berlin: Walter de Gruyter.
- Lemmon, A. R., Emme, S. A. and Lemmon, E. M. (2012). Anchored Hybrid Enrichment for Massively High-Throughput Phylogenomics. *Systematic Biology* **61**, 727–744.
- Lentink, D., Muller, U. K., Stamhuis, E. J., de Kat, R., van Gestel, W., Veldhuis, L. L. M., Henningson, P., Hedenstrom, A., Videler, J. J. and van Leeuwen, J. L. (2007). How swifts control their glide performance with morphing wings. *Nature* **446**, 1082–1085.
- Lewis, F. P., Fullard, J. H. and Morrill, S. B. (1993). Auditory Influences on the Flight Behavior of Moths in a Nearctic Site. 2. Flight Times, Heights, and Erraticism. *Canadian Journal of Zoology-Revue Canadienne De Zoologie* **71**, 1562–1568.
- Mathews, M. and Sponberg, S. (2018). Hawkmoth flight in the unsteady wakes of flowers. *The Journal of Experimental Biology* **221**, jeb179259.
- Maybury, W. J. and Lehmann, F.-O. (2004). The fluid dynamics of flight control by kinematic phase lag variation between two robotic insect wings. *Journal of Experimental Biology* **207**, 4707–4726.
- Minh, B. Q., Nguyen, M. A. T. and von Haeseler, A. (2013). Ultrafast Approximation for Phylogenetic Bootstrap. *Molecular Biology and Evolution* **30**, 1188–1195.
- Mujires, F. T., Iwasaki, N. A., Elzinga, M. J., Melis, J. M. and Dickinson, M. H. (2017). Flies compensate for unilateral wing damage through modular adjustments of wing and body kinematics. *Interface Focus* **7**.
- Natesan, D., Saxena, N., Ekeberg, O. and Sane, S. P. (2019). Tuneable reflexes control antennal positioning in flying hawkmoths. *Nat Commun* **10**.
- Nguyen, L. T., Schmidt, H. A., von Haeseler, A. and Minh, B. Q. (2015). IQ-TREE: A Fast and Effective Stochastic Algorithm for Estimating Maximum-Likelihood Phylogenies. *Molecular Biology and Evolution* **32**, 268–274.
- Norberg, U. M. and Rayner, J. M. V. (1987). Ecological Morphology and Flight in Bats (Mammalia, Chiroptera) - Wing Adaptations, Flight Performance, Foraging Strategy and Echolocation. *Philosophical Transactions of the Royal Society B-Biological Sciences* **316**, 337–419.
- Olsen, A. M. (2017). Feeding ecology is the primary driver of beak shape diversification in waterfowl. *Functional Ecology* **31**, 1985–1995.
- Olsen, A. M. and Westneat, M. W. (2015). StereoMorph: an R package for the collection of 3D landmarks and curves using a stereo camera set-up. *Methods in Ecology and Evolution* **6**, 351–356.
- Pennycuik, C. J. (1968). Power Requirements for Horizontal Flight in Pigeon *Columba Livia*. *Journal of Experimental Biology* **49**, 527–+.
- Ray, R. P., Nakata, T., Henningson, P. and Bomphrey, R. J. (2016). Enhanced flight performance by genetic manipulation of wing shape in *Drosophila*. *Nat Commun* **7**, 10851.
- Revell, L. J. (2009). Size-Correction and Principal Components for Interspecific Comparative Studies. *Evolution* **63**, 3258–3268.
- Revell, L. J. (2012). phytools: An R package for phylogenetic comparative biology (and other things). *Methods Ecol. Evol.* **3**, 217–223.
- Riffell, J. A., Lei, H., Abrell, L. and Hildebrand, J. G. (2013). Neural basis of a pollinator's buffet: olfactory specialization and learning in *Manduca sexta*. *Science* **339**, 200–204.
- Riskin, D. K., Iriarte-Diaz, J., Middleton, K. M., Breuer, K. S. and Swartz, S. M. (2010). The effect of body size on the wing movements of pteropodid bats, with insights into thrust and lift production. *Journal of Experimental Biology* **213**, 4110–4122.
- Roth, E., Hall, R. W., Daniel, T. L. and Sponberg, S. (2016). Integration of parallel mechanosensory and visual pathways resolved through sensory conflict. *Proceedings of the National Academy of Sciences* **113**, 12832–12837.
- Rubin, J. J., Hamilton, C. A., McClure, C. J. W., Chadwell, B. A., Kawahara, A. Y. and Barber, J. R. (2018). The evolution of anti-bat sensory illusions in moths. *Science Advances* **4**.
- Sane, S. P. and Dickinson, M. H. (2001). The control of flight force by a flapping wing: lift and drag production. *The Journal of experimental biology* **204**, 2607–26.
- Sane, S. P. and Dickinson, M. H. (2002). The aerodynamic effects of wing rotation and a revised quasi-steady model of flapping flight. *Journal of Experimental Biology* **205**, 1087–1096.
- Sponberg, S., Dyhr, J. P., Hall, R. W. and Daniel, T. L. (2015). Luminance-dependent visual processing enables moth flight in low light. *Science* **348**, 1245–1248.
- Sprayberry, J. D. H. and Daniel, T. L. (2007). Flower tracking in hawkmoths: behavior and energetics. *Journal of Experimental Biology* **210**, 37–45.
- Stöckl, A. L., Kihlström, K., Chandler, S. and Sponberg, S. (2017a). Comparative system identification of flower tracking performance in three hawkmoth species reveals adaptations for dim light vision. *Philosophical Transactions of the Royal Society B-Biological Sciences* **372**, 20160078–20160079.
- Stöckl, A. L., O'Carroll, D. and Warrant, E. J. (2017b). Higher-order neural processing tunes motion neurons to visual ecology in three species of hawkmoths. *Proceedings of the Royal Society B: Biological Sciences* **284**, 20170880.
- Stowers, A. K., Matloff, L. Y. and Lentink, D. (2017). How pigeons couple three-dimensional elbow and wrist motion to morph their wings. *Journal of the Royal Society Interface* **14**.



- Tanmaru, T. and Haukioja, E.** (1996). Capital breeders and income breeders among Lepidoptera - Consequences to population dynamics. *Oikos* **77**, 561–564.
- Truong, Q. T., Nguyen, Q. V., Truong, V. T., Park, H. C., Byun, D. Y. and Goo, N. S.** (2011). A modified blade element theory for estimation of forces generated by a beetle-mimicking flapping wing system. *Bioinspiration and Biomimetics* **6**.
- Tuskes, P. M., Tuttle, J. P. and Collins, M. M.** (1996). *The Wild Silk Moths of North America: A Natural History of the Saturniidae of the United States and Canada*. Ithica, NY: Cornell University Press.
- Tuttle, J.** (2007). *The Hawk Moths of North America: A Natural History Study of the Sphingidae of the United States and Canada*.
- Usherwood, J. R. and Ellington, C. P.** (2002). The aerodynamics of revolving wings II. Propeller force coefficients from mayfly to quail. *Journal of Experimental Biology* **205**, 1565–1576.
- Warrick, D. R., Dial, K. P. and Biewener, A. A.** (1998). Asymmetrical force production in the slow maneuvering flight of pigeons. *Auk* **115**, 916–928.
- Wasserthal, L.** (1993). Swing-hovering combined with long tongue in hawkmoths, an antipredator adaptation during flower visits. In *Animal-plant interactions in tropical environments*. (ed. B. W. N. C. S.-L. K. S. LL), pp. 77–87. Bonn: Zoologisches Forschungsinstitut und Museum König.
- Wasserthal, L. T.** (1998). Deep flowers for long tongues. *Trends in Ecology & Evolution* **13**, 459–460.
- Willmott, A. P. and Ellington, C. P.** (1997a). The mechanics of flight in the hawkmoth *Manduca sexta*. I. Kinematics of hovering and forward flight. *Journal of Experimental Biology* **200**, 2705–2722.
- Willmott, A. P. and Ellington, C. P.** (1997b). The mechanics of flight in the hawkmoth *Manduca sexta*. II. Aerodynamic consequences of kinematic and morphological variation. *Journal of Experimental Biology* **200**, 2723–2745.
- Windsor, S. P., Bompfrey, R. J. and Taylor, G. K.** (2014). Vision-based flight control in the hawkmoth *Hyles lineata*. *Journal of the Royal Society Interface* **11**.
- Wootton, R. J.** (1992). Functional-Morphology of Insect Wings. *Annual Review of Entomology* **37**, 113–140.
- Xia, Q. Y., Zhou, Z. Y., Lu, C., Cheng, D. J., Dai, F. Y., Li, B., Zhao, P., Zha, X. F., Cheng, T. C., Chai, C. L. et al.** (2004). A draft sequence for the genome of the domesticated silkworm (*Bombyx mori*). *Science* **306**, 1937–1940.



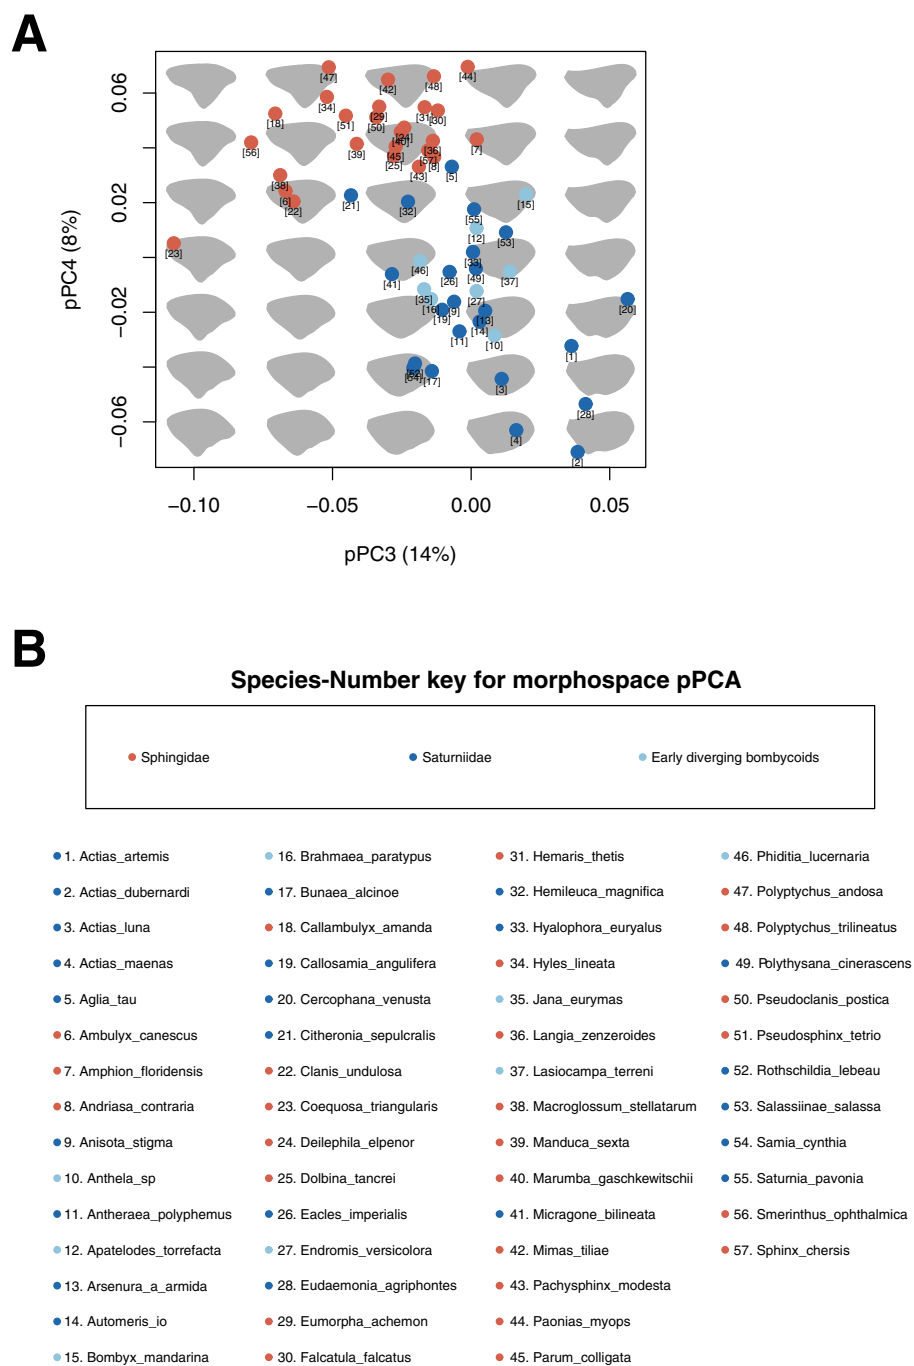

**Fig. S2. A** Forewing morphospace across the pPC3 and pPC4 axes. Projections of the taxa onto the third and fourth phylogenetic principal components also demonstrates the separation of extant hawkmoths and silkmooths. **B** Key for species names in morphospace. This figure contains the number and corresponding scientific name of each species in morphospace. These numbers are used in panel A and in Fig. 2

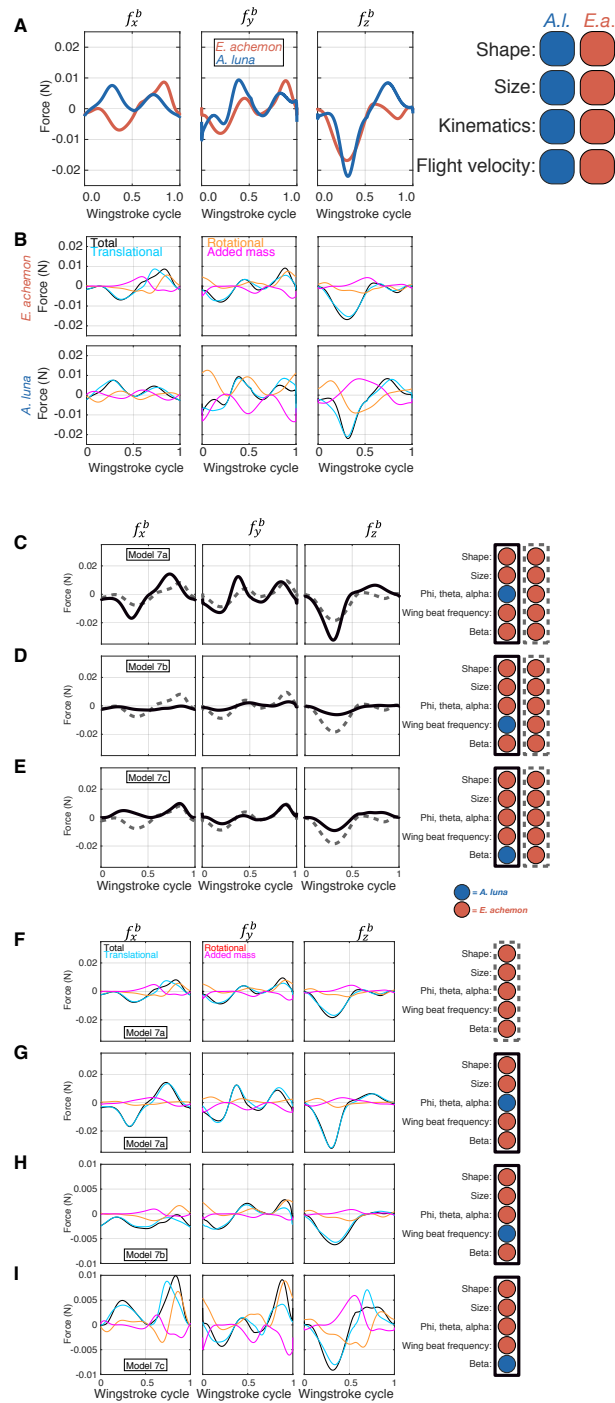

**Fig. S3. A-B** The total, translational, rotational, and added mass components of aerodynamic force during recorded flight speeds. (A) The total forces for *A. luna* (blue) and *E. achemon* (red) modeled at their natural flight velocities. (B) The component forces for each model using recorded flight velocities of each species. **C-I** The role of kinematic parameters in shaping the aerodynamics of each species. This set of models investigates the contribution of wing kinematics (C), wing beat frequency (D), and stroke plane angle (E) to total aerodynamic force production. In each panel, the two models are distinguished by solid and dashed lines. The variables used in each model can be found to the right of the data and are outlined in a corresponding solid or dashed line. The color of each circle represents the species from which each variable was measured. The components of the total aerodynamic force generated in each model are presented in panels **F-I**. The component forces for the dashed line model are only presented once (Panel E) because they are the same in each model.

| Tip Name                                                                              | Family        | Genus        | Species      | Data          | Dataset                       | Recovery | Geus_species_of_imaged_moth | N Females | N Males | N Total |
|---------------------------------------------------------------------------------------|---------------|--------------|--------------|---------------|-------------------------------|----------|-----------------------------|-----------|---------|---------|
| _Acti                                                                                 | Saturniidae   | Actias       | luna         | transcriptome | Kawahara & Breinholt 2014     | 776      | Actias_luna                 | 0         | 2       | 2       |
| _MSEX                                                                                 | Sphingidae    | Manduca      | sexta        | transcriptome | Kawahara & Breinholt 2014     | 790      | Manduca_sexta               | 0         | 2       | 2       |
| 247279219_Sphingidae_Smerinthinae_Polyptychus-Genus-Group_x_Polyptychus_trilineatus_x | Sphingidae    | Polyptychus  | trilineatus  | AHE           | NEW                           | 244      | Polyptychus_trilineatus     | 0         | 2       | 2       |
| 25Sphingidae_Sphingidae_Smerinthinae_Polyptychus-Genus-Group_x_Pseudoclanis_postica_x | Sphingidae    | Pseudoclanis | postica      | AHE           | NEW                           | 496      | Pseudoclanis_postica        | 0         | 2       | 2       |
| AD3153_Sphingidae_Andriasa_contraria                                                  | Sphingidae    | Andriasa     | contraria    | AHE           | Hamilton et al., 2019         | 720      | Andriasa_contraria          | 0         | 2       | 2       |
| ADW1522_Saturniidae_Hemileucinae_Hemileuca_magnifica                                  | Saturniidae   | Hemileuca    | magnifica    | AHE           | Hamilton et al., 2019         | 402      | Hemileuca_magnifica         | 0         | 3       | 3       |
| AYK140002_Saturniidae_Antheraea_polyphemus                                            | Saturniidae   | Antheraea    | polyphemus   | AHE           | Rubin & Hamilton et al., 2018 | 750      | Antheraea_polyphemus        | 0         | 5       | 5       |
| CAH0104_Saturniidae_Saturninae_Attacini_x_Callosamia_angulifera_x                     | Saturniidae   | Callosamia   | angulifera   | AHE           | NEW                           | 564      | Callosamia_angulifera       | 0         | 5       | 5       |
| DNA4227_Anthelidae_Anthela_ocellata                                                   | Anthelidae    | Anthela      | ocellata     | AHE           | Hamilton et al., 2019         | 442      | Anthela_sp                  | 1         | 0       | 1       |
| DT2557_Sphingidae_Dolbina_tancrei                                                     | Sphingidae    | Dolbina      | tancrei      | AHE           | Hamilton et al., 2019         | 774      | Dolbina_tancrei             | 0         | 2       | 2       |
| Ffaa_Sphingidae_Falcatula_falcata                                                     | Sphingidae    | Falcatula    | falcata      | AHE           | Hamilton et al., 2019         | 761      | Falcatula_falcatula         | 0         | 1       | 1       |
| HL1881_Sphingidae_Hyles_lineata                                                       | Sphingidae    | Hyles        | lineata      | AHE           | NEW                           | 761      | Hyles_lineata               | 0         | 2       | 2       |
| 13503_Saturniidae_Eacles_imperialis_or_ormondei                                       | Saturniidae   | Eacles       | imperialis   | AHE           | Hamilton et al., 2019         | 738      | Eacles_imperialis           | 0         | 3       | 3       |
| 13504_Saturniidae_Samia_tetrica                                                       | Saturniidae   | Samia        | tetrica      | AHE           | Rubin & Hamilton et al., 2018 | 753      | Samia_cynthia               | 0         | 5       | 5       |
| 13508_Saturniidae_Actias_maenas                                                       | Saturniidae   | Actias       | maenas       | AHE           | Rubin & Hamilton et al., 2018 | 766      | Actias_maenas               | 0         | 2       | 2       |
| 13511_Sphingidae_Coequosa_triangularis                                                | Sphingidae    | Coequosa     | triangularis | AHE           | Hamilton et al., 2019         | 766      | Coequosa_triangularis       | 1         | 0       | 1       |
| 13518_Sphingidae_Pachysphinx occidentalis                                             | Sphingidae    | Pachysphinx  | imperator    | AHE           | NEW                           | 776      | Pachysphinx_modesta         | 0         | 3       | 3       |
| 13519_Sphingidae_Sphinx_cheris                                                        | Sphingidae    | Sphinx       | cheris       | AHE           | Hamilton et al., 2019         | 775      | Sphinx_cheris               | 0         | 2       | 2       |
| 13523_Laophontiidae_Langia_zenzeroides                                                | Sphingidae    | Langia       | zenzeroides  | AHE           | Hamilton et al., 2019         | 763      | Langia_zenzeroides          | 0         | 2       | 2       |
| 13524_Sphingidae_Mimas_tiliae                                                         | Sphingidae    | Mimas        | tiliae       | AHE           | NEW                           | 780      | Mimas_tiliae                | 0         | 2       | 2       |
| 13528_Sphingidae_Amphion_floridensis                                                  | Sphingidae    | Amphion      | floridensis  | AHE           | NEW                           | 766      | Amphion_floridensis         | 0         | 2       | 2       |
| 13530_Sphingidae_Pseudosphinx_UNKNOWN                                                 | Sphingidae    | Pseudosphinx | tertio       | AHE           | Hamilton et al., 2019         | 771      | Pseudosphinx_tertio         | 0         | 2       | 2       |
| LEP-43120_Lasiocampidae_Lasiocampinae_Lasiocampini_x_Prorifrons_sp_x                  | Lasiocampidae | Prorifrons   | sp           | AHE           | NEW                           | 497      | Lasiocamp_terreni           | 0         | 2       | 2       |
| LEP-44917_Saturniidae_Ceratocampinae_x_x_Citheronia_sepulcralis_x                     | Saturniidae   | Citheronia   | sepulcralis  | AHE           | NEW                           | 567      | Citheronia_sepulcralis      | 0         | 2       | 2       |
| LEP-52739_Bombycidae_Bombycinae_x_x_Bombyx_mandarina_x                                | Bombycidae    | Bombyx       | mandarina    | AHE           | NEW                           | 586      | Bombyx_mandarina            | 0         | 2       | 2       |
| LEP-62244_Saturniidae_Aglinae_x_x_Aglia_tau_x                                         | Saturniidae   | Aglia        | tau          | AHE           | NEW                           | 565      | Aglia_tau                   | 0         | 3       | 3       |
| LEP21292_Sphingidae_Ambulyx_canescens                                                 | Sphingidae    | Ambulyx      | canescens    | AHE           | Hamilton et al., 2019         | 723      | Ambulyx_canescens           | 0         | 2       | 2       |
| LEP212513_Sphingidae_Macroglossinae_Macroglossum_sylvia                               | Sphingidae    | Macroglossum | sylvia       | AHE           | Hamilton et al., 2019         | 532      | Macroglossum_stellatarum    | 0         | 1       | 1       |
| LEP212527_Sphingidae_Callambulyx_amanda                                               | Sphingidae    | Callambulyx  | amanda       | AHE           | Hamilton et al., 2019         | 741      | Callambulyx_amanda          | 0         | 1       | 1       |
| LEP212973_Sphingidae_Smerinthinae_Clanis_undulosa                                     | Sphingidae    | Clanis       | undulosa     | AHE           | Hamilton et al., 2019         | 595      | Clanis_undulosa             | 0         | 2       | 2       |
| LEP214056_Sphingidae_Smerinthinae_Paonias_myops                                       | Saturniidae   | Paonias      | myops        | AHE           | NEW                           | 618      | Paonias_myops               | 0         | 3       | 3       |
| LEP214171_Sphingidae_Macroglossinae_Dellephila_elpenor                                | Sphingidae    | Dellephila   | elpenor      | AHE           | NEW                           | 589      | Dellephila_elpenor          | 0         | 2       | 2       |
| LEP214407_Sphingidae_Macroglossinae_Eumorpha_achemon                                  | Saturniidae   | Eumorpha     | achemon      | AHE           | NEW                           | 597      | Eumorpha_achemon            | 0         | 2       | 2       |
| LEP21041_Sphingidae_Smerinthinae_Polyptychus_andosae                                  | Sphingidae    | Polyptychus  | andosae      | AHE           | Hamilton et al., 2019         | 548      | Polyptychus_andosae         | 0         | 2       | 2       |
| LEP23372_Sphingidae_Smerinthinae_Smerinthus_jamaicensis                               | Sphingidae    | Smerinthus   | jamaicensis  | AHE           | Hamilton et al., 2019         | 605      | Smerinthus_ophthalmica      | 2         | 0       | 2       |
| LEP24256_Bombycidae_Apatelodes_firmiana                                               | Apatelodidae  | Apatelodes   | firmiana     | AHE           | Hamilton et al., 2019         | 703      | Apatelodes_torrefacta       | 0         | 3       | 3       |
| LEP24348_Phiditiidae_Unknown_Phiditia_sp                                              | Phiditiidae   | Phiditia     | sp           | AHE           | NEW                           | 547      | Phiditia_lucernaria         | 0         | 2       | 2       |
| LEP24721_Saturniidae_Hemileucinae_Automeris_janus                                     | Saturniidae   | Automeris    | janus        | AHE           | NEW                           | 614      | Automeris_io                | 0         | 2       | 2       |
| LEP28601_Saturniidae_Rothschildia_lebeau                                              | Saturniidae   | Rothschildia | lebeau       | AHE           | Rubin & Hamilton et al., 2018 | 533      | Rothschildia_lebeau         | 0         | 4       | 4       |
| LEP29044_Saturniidae_Arsenura_armida                                                  | Saturniidae   | Arsenura     | armida       | AHE           | Rubin & Hamilton et al., 2018 | 766      | Arsenura_armida             | 0         | 3       | 3       |
| LEP32277d_Saturniidae_Bunaea_alcinoe                                                  | Saturniidae   | Bunaea       | alcinoe      | AHE           | Rubin & Hamilton et al., 2018 | 702      | Bunaea_alcinoe              | 0         | 2       | 2       |
| LEP36752_Sphingidae_Macroglossinae_Hemaris_thysbe                                     | Sphingidae    | Hemaris      | thysbe       | AHE           | Hamilton et al., 2019         | 592      | Hemaris_thetis              | 0         | 1       | 1       |
| LEP39332_Saturniidae_Saturninae_Hyalophora_colombia                                   | Saturniidae   | Hyalophora   | colombia     | AHE           | NEW                           | 542      | Hyalophora_euryalus         | 0         | 3       | 3       |
| LEP39470_Saturniidae_Ceratocampinae_Anisota_pellucida                                 | Saturniidae   | Anisota      | pellucida    | AHE           | Hamilton et al., 2019         | 585      | Anisota_stigma              | 1         | 0       | 1       |
| LEP40497_Saturniidae_Saturninae_Actias_philippina                                     | Saturniidae   | Actias       | philippina   | AHE           | Rubin & Hamilton et al., 2018 | 570      | Actias_dubermardi           | 0         | 2       | 2       |
| LEP41075_Saturniidae_Eudaemonia_agrippontes                                           | Saturniidae   | Eudaemonia   | agrippontes  | AHE           | Rubin & Hamilton et al., 2018 | 760      | Eudaemonia_agrippontes      | 0         | 3       | 3       |
| LEP41093_Saturniidae_Salassa_sp                                                       | Saturniidae   | Salassa      | sp           | AHE           | Rubin & Hamilton et al., 2018 | 748      | Salassinae_salassa          | 0         | 3       | 3       |
| LEP41811_Saturniidae_Cercophaninae_Cercophana_venusta                                 | Saturniidae   | Cercophana   | venusta      | AHE           | Hamilton et al., 2019         | 598      | Cercophana_venusta          | 0         | 2       | 2       |
| LEP43920_Saturniidae_Saturninae_Micragone_agathylla                                   | Saturniidae   | Micragone    | agathylla    | AHE           | Rubin & Hamilton et al., 2018 | 561      | Micragone_bilineata         | 0         | 1       | 1       |
| LEP47817_Saturniidae_Hemileucinae_Polythysana_cinerascens                             | Saturniidae   | Polythysana  | cinerascens  | AHE           | Hamilton et al., 2019         | 525      | Polythysana_cinerascens     | 0         | 2       | 2       |
| RRO000221_Brahmaeidae_Acanthobrahmaea_europaea_sp                                     | Brahmaeidae   | Brahmaea     | europaea     | AHE           | Hamilton et al., 2019         | 502      | Brahmaea_paratypus          | 0         | 1       | 1       |
| RSP951002_Endromidae_Endromis_versicolora                                             | Endromidae    | Endromis     | versicolora  | AHE           | Hamilton et al., 2019         | 769      | Endromis_versicolora        | 0         | 2       | 2       |
| RSP0045_Saturniidae_Actias_arteris                                                    | Saturniidae   | Actias       | arteris      | AHE           | Rubin & Hamilton et al., 2018 | 764      | Actias_arteris              | 0         | 2       | 2       |
| S1C1R3D_Saturniidae_Saturninae_Saturnia_eudia_pavonia                                 | Saturniidae   | Saturnia     | pavonia      | AHE           | Hamilton et al., 2019         | 588      | Saturnia_pavonia            | 0         | 3       | 3       |
| SMNSNDALP293_Eupterotidae_Janinae_Jana_preciosa                                       | Eupterotidae  | Jana         | preciosa     | AHE           | Hamilton et al., 2019         | 575      | Jana_eurymas                | 0         | 2       | 2       |
| SW130019T_Sphingidae_Smerinthinae_Smerinthini_Marumba_sp                              | Sphingidae    | Marumba      | sp           | transcriptome | NEW                           | 719      | Marumba_gaschkewitschii     | 0         | 2       | 2       |
| V005T_Sphingidae_Smerinthinae_Smerinthini_Parum_colligata                             | Sphingidae    | Parum        | colligata    | transcriptome | NEW                           | 723      | Parum_colligata             | 0         | 2       | 2       |

**Table S1. Tip names and data source of each species in phylogeny as well as sex and count of individuals used in shape analysis for each species**

| VARIABLE                        | All clades |            |            |          | Silkmots and Hawkmoths only |          |          |          | Silkmots only |          |          |          | Hawkmoths only |          |          |          |
|---------------------------------|------------|------------|------------|----------|-----------------------------|----------|----------|----------|---------------|----------|----------|----------|----------------|----------|----------|----------|
|                                 | Lambda     | logL       | logLO      | p        | Lambda                      | logL     | logLO    | p        | Lambda        | logL     | logLO    | p        | Lambda         | logL     | logLO    | p        |
| Wing length                     | 6.73E-01   | 154.77413  | 152.72192  | 4.28E-02 | 5.97E-01                    | 134.6236 | 132.7487 | 5.25E-02 | 4.78E-01      | 62.89071 | 62.43487 | 0.339669 | 7.53E-01       | 72.96265 | 72.68433 | 0.455618 |
| Mean chord length of wing       | 8.04E-01   | 222.56847  | 211.63032  | 2.91E-06 | 7.17E-01                    | 193.8313 | 182.1356 | 1.32E-06 | 5.92E-01      | 87.87921 | 86.95188 | 0.173243 | 2.23E-01       | 109.5684 | 109.4971 | 0.705753 |
| Wing Area                       | 6.61E-01   | 355.15542  | 349.67178  | 9.27E-04 | 5.76E-01                    | 306.6241 | 300.5873 | 5.11E-04 | 3.86E-01      | 139.564  | 139.2045 | 0.396474 | 5.63E-01       | 171.762  | 171.774  | 1        |
| Radius of second moment of area | 8.94E-01   | 156.6572   | 146.81576  | 9.14E-06 | 7.62E-01                    | 139.3126 | 133.2992 | 5.24E-04 | 7.98E-01      | 61.96275 | 60.67493 | 0.10852  | 7.95E-05       | 82.46353 | 82.46368 | 1        |
| Aspect ratio                    | 8.66E-01   | -27.37978  | -54.46312  | 1.84E-13 | 7.94E-01                    | -21.4874 | -45.943  | 2.68E-12 | 6.70E-05      | -3.61346 | -3.61313 | 1        | 7.95E-05       | -8.13094 | -8.1307  | 1        |
| Body length                     | 4.93E-01   | 182.05982  | 180.31661  | 6.19E-02 | 3.30E-01                    | 157.8792 | 155.8999 | 4.66E-02 | 6.70E-05      | 80.09822 | 80.09846 | 1        | 9.94E-01       | 81.85932 | 81.88774 | 1        |
| Body mass                       | 6.65E-05   | -88.65496  | -88.6541   | 1.00E+00 | 6.67E-05                    | -77.504  | -77.5037 | 1.00E+00 | 6.70E-05      | -28.0873 | -28.0871 | 0.020265 | 8.98E-01       | -45.8953 | -45.4909 | 1        |
| Wing beat frequency             | 9.68E-01   | -202.68686 | -221.00342 | 1.43E-09 | 9.63E-01                    | -171.949 | -191.554 | 3.81E-10 | 8.88E-01      | -68.9056 | -71.6001 | 0.020265 | 9.00E-01       | -95.5285 | -99.2592 | 0.006303 |
| Wing loading                    | 9.25E-01   | 88.49541   | 73.49837   | 4.33E-08 | 1.01E+00                    | 77.64915 | 60.71952 | 5.92E-09 | 9.89E-01      | 55.15641 | 53.3409  | 0.056712 | 8.01E-01       | 35.38334 | 32.86191 | 0.024728 |
| Thorax length (% body length)   | 7.41E-01   | 109.0667   | 103.55681  | 9.01E-04 | 4.11E-01                    | 99.19072 | 93.71724 | 9.38E-04 | 5.95E-05      | 46.63365 | 46.63371 | 1        | 7.95E-05       | 55.46341 | 55.46362 | 1        |
| Abdomen length (% body length)  | 8.02E-01   | 101.83411  | 97.28912   | 2.57E-03 | 5.92E-01                    | 91.86848 | 88.17052 | 6.54E-03 | 4.29E-01      | 41.57689 | 41.19002 | 0.379065 | 7.25E-01       | 52.01277 | 50.48391 | 0.080354 |
| Abdomen length (meters)         | 7.67E-01   | 202.6083   | 200.03252  | 2.32E-02 | 8.76E-01                    | 176.1017 | 172.9968 | 1.27E-02 | 6.70E-05      | 88.18174 | 88.18192 | 1        | 9.23E-01       | 91.28054 | 91.34096 | 0.080354 |
| Inertial power                  | 7.88E-01   | -220.16556 | -222.89423 | 1.95E-02 | 7.70E-01                    | -187.489 | -188.932 | 8.93E-02 | 1.79E-01      | -81.3109 | -81.3337 | 0.830876 | 8.72E-01       | -101.994 | -103.019 | 0.152355 |
| pPC1                            | 7.92E-01   | 98.08059   | 73.38695   | 2.10E-12 | 7.23E-01                    | 85.00891 | 61.67966 | 8.45E-12 | 6.70E-05      | 41.22814 | 41.22848 | 1        | 2.42E-01       | 54.4627  | 54.26087 | 0.525214 |
| pPC2                            | 6.41E-01   | 110.485    | 106.707    | 5.98E-03 | 8.20E-02                    | 99.33557 | 99.25253 | 6.84E-01 | 3.04E-01      | 43.16479 | 42.8051  | 0.396353 | 7.95E-05       | 59.07206 | 59.07238 | 1        |
| pPC3                            | 5.89E-01   | 126.1117   | 118.483    | 9.38E-05 | 5.77E-01                    | 107.7102 | 99.98249 | 8.45E-05 | 7.99E-01      | 54.79132 | 53.60685 | 0.123771 | 7.95E-05       | 57.79694 | 57.79727 | 1        |
| pPC4                            | 8.62E-01   | 133.768    | 107.5375   | 4.39E-13 | 8.49E-01                    | 115.9159 | 90.28858 | 8.11E-13 | 7.81E-01      | 51.58913 | 50.12487 | 0.087028 | 7.95E-05       | 72.31542 | 72.31576 | 1        |

Significant P values are in bold

Table S2. Phylogenetic signal for each variable using the entire phylogeny and various pruned phylogenies

| Node number | pPC1            |              |              | pPC2            |              |              | Mean chord length of wing |              |              | Wing area       |              |              | Radius of the second moment of area |              |              | Aspect ratio    |              |              | Body length     |              |              |           |            |           |
|-------------|-----------------|--------------|--------------|-----------------|--------------|--------------|---------------------------|--------------|--------------|-----------------|--------------|--------------|-------------------------------------|--------------|--------------|-----------------|--------------|--------------|-----------------|--------------|--------------|-----------|------------|-----------|
|             | ancestral state | Upper 95% CI | Lower 95% CI | ancestral state | Upper 95% CI | Lower 95% CI | ancestral state           | Upper 95% CI | Lower 95% CI | ancestral state | Upper 95% CI | Lower 95% CI | ancestral state                     | Upper 95% CI | Lower 95% CI | ancestral state | Upper 95% CI | Lower 95% CI | ancestral state | Upper 95% CI | Lower 95% CI |           |            |           |
| 58          | -5.67E-16       | -0.11478317  | -0.1147832   | -0.11478317     | -0.0483098   | 0.04830978   | 0.0350532                 | 0.0542559    | 0.0702363    | 0.01248319      | 0.0131569    | 0.0269967    | 0.000524736                         | -1.01E-03    | 0.02070831   | 0.585369        | 0.5471965    | 0.6234515    | 2.448937        | 0.203795     | 6.644139     | 0.0282993 | 0.0043255  | 0.031655  |
| 59          | -2.56E-03       | -0.0673981   | 0.00227562   | -0.0673981      | 0.00227562   | 0.01036083   | 0.0384712                 | 0.01516293   | 0.0155795    | 0.01242219      | 0.00544969   | 0.0210447    | 0.00009192                          | -2.40E-04    | 0.001480778  | 0.574515        | 0.5529294    | 0.5907777    | 2.938201        | 2.492317     | 3.41345      | 0.0291429 | 0.0129615  | 0.0007817 |
| 60          | -4.91E-03       | -0.06153517  | 0.00160051   | -0.06153517     | 0.00160051   | 0.01672385   | 0.0374161                 | 0.01761202   | 0.0177251    | 0.01262839      | 0.00681527   | 0.01944313   | 0.000461362                         | -2.05E-04    | 0.001321769  | 0.5689185       | 0.5500966    | 0.5817963    | 3.029427        | 2.627493     | 3.413362     | 0.0281374 | 0.01406483 | 0.0007814 |
| 61          | -7.75E-03       | -0.04709037  | 0.00489222   | -0.04709037     | 0.00489222   | 0.01254529   | 0.03776706                | 0.01767655   | 0.01785706   | 0.01249987      | 0.0071745    | 0.01928284   | 0.000567440                         | -2.02E-04    | 0.001331735  | 0.5673409       | 0.54841      | 0.5817963    | 3.08332         | 2.627493     | 3.413362     | 0.0281374 | 0.01406483 | 0.0007814 |
| 62          | -1.22E-02       | -0.06810748  | 0.00448395   | -0.06810748     | 0.00448395   | 0.01254529   | 0.03877421                | 0.01817689   | 0.01797073   | 0.01203485      | 0.00824101   | 0.01946451   | 0.000500417                         | -1.86E-05    | 0.001317023  | 0.5609439       | 0.5471965    | 0.5817963    | 3.143461        | 2.793618     | 3.544204     | 0.0271403 | 0.01407224 | 0.0014128 |
| 63          | -8.46E-02       | -0.13425498  | 0.00859561   | -0.13425498     | 0.00859561   | 0.02199887   | 0.0425123                 | 0.02564655   | 0.02610006   | 0.01566137      | 0.00943221   | 0.02660006   | 0.00048677                          | -7.05E-04    | 0.001189664  | 0.568473        | 0.553212     | 0.582422     | 3.262687        | 3.244366     | 3.201528     | 0.0284882 | 0.0146177  | 0.0046896 |
| 64          | 9.25E-02        | 0.13866194   | -0.0643063   | 0.13866194      | -0.0643063   | -0.0179508   | 0.0450511                 | 0.02851881   | 0.014462     | 0.01453115      | 0.0011569    | 0.0170706    | 0.000580611                         | -4.46E-05    | 0.001204794  | 0.5673409       | 0.5520086    | 0.5826815    | 3.193472        | 3.62043      | 4.25792      | 0.0379693 | 0.0279776  | 0.0479988 |
| 65          | -9.85E-02       | -0.13681536  | -0.05691497  | -0.13681536     | -0.05691497  | -0.02330598  | 0.0433098                 | 0.03104783   | 0.0164538    | 0.01444204      | 0.00668381   | 0.0164958    | 0.00059982                          | 2.97E-05     | 0.00112076   | 0.567425        | 0.5538072    | 0.582422     | 3.502204        | 3.187156     | 3.245659     | 0.0358373 | 0.0299392  | 0.0472354 |
| 66          | -9.64E-02       | -0.13115102  | -0.06106687  | -0.13115102     | -0.06106687  | -0.02415617  | 0.046027                  | 0.0339887    | 0.01580213   | 0.01596277      | 0.0077011    | 0.0158158    | 0.000582517                         | 1.04E-04     | 0.00102694   | 0.566473        | 0.5544863    | 0.579965     | 3.97969         | 3.72542      | 3.29691      | 0.0389117 | 0.0124363  | 0.0465892 |
| 67          | -9.48E-02       | -0.12786235  | -0.06237826  | -0.12786235     | -0.06237826  | -0.02494403  | 0.0460303                 | 0.03454767   | 0.0176316    | 0.01434879      | 0.0070078    | 0.0150547    | 0.000589378                         | 1.47E-04     | 0.001020293  | 0.566473        | 0.5546824    | 0.5772682    | 3.96832         | 3.73532      | 3.12995      | 0.0389334 | 0.0124363  | 0.0465892 |
| 68          | -5.75E-02       | -0.10776073  | -0.04897875  | -0.10776073     | -0.04897875  | -0.008172687 | 0.0497875                 | 0.03550414   | 0.01647233   | 0.01471672      | 0.00797874   | 0.01494784   | 0.000546661                         | 3.03E-04     | 0.000956483  | 0.5793123       | 0.5683492    | 0.5817963    | 3.722535        | 3.499564     | 3.944519     | 0.0387624 | 0.0121778  | 0.0417572 |
| 69          | -9.43E-02       | -0.12758098  | -0.06112011  | -0.12758098     | -0.06112011  | -0.0173919   | 0.04667862                | 0.0358211    | 0.01582633   | 0.01504441      | 0.00790329   | 0.0150395    | 0.000580163                         | 1.61E-04     | 0.001026126  | 0.567123        | 0.5567041    | 0.57812      | 3.94475         | 3.70888      | 3.18078      | 0.0389406 | 0.0124303  | 0.0461818 |
| 70          | -9.31E-02       | -0.12998483  | -0.0643063   | -0.12998483     | -0.0643063   | -0.01856406  | 0.0458387                 | 0.03475723   | 0.01588852   | 0.01179998      | 0.00730136   | 0.0164498    | 0.000580954                         | 9.39E-05     | 0.001058584  | 0.5689846       | 0.5529092    | 0.5820672    | 3.92572         | 3.65556      | 3.45808      | 0.0384586 | 0.0124363  | 0.0463791 |
| 71          | -5.64E-02       | -0.09350563  | -0.01550937  | -0.09350563     | -0.01550937  | -0.02399734  | 0.0489419                 | 0.03615351   | 0.01633204   | 0.01224196      | 0.0077266    | 0.0164618    | 0.000577378                         | 1.37E-04     | 0.001137964  | 0.5645465       | 0.552469     | 0.5794661    | 3.402965        | 3.765041     | 3.29691      | 0.0415666 | 0.0131444  | 0.0479555 |
| 72          | -7.84E-02       | -0.10849427  | -0.0485671   | -0.10849427     | -0.0485671   | -0.008172687 | 0.0497875                 | 0.03550414   | 0.01647233   | 0.01471672      | 0.00797874   | 0.01494784   | 0.000546661                         | 3.03E-04     | 0.000956483  | 0.5793123       | 0.5683492    | 0.5817963    | 3.722535        | 3.499564     | 3.944519     | 0.0387624 | 0.0121778  | 0.0417572 |
| 73          | -9.37E-02       | -0.1382504   | -0.0662316   | -0.1382504      | -0.0662316   | -0.0144451   | 0.0497875                 | 0.03475723   | 0.01588852   | 0.01179998      | 0.00730136   | 0.0164498    | 0.000580954                         | 9.39E-05     | 0.001058584  | 0.5689846       | 0.5529092    | 0.5820672    | 3.92572         | 3.65556      | 3.45808      | 0.0384586 | 0.0124363  | 0.0463791 |
| 74          | 9.51E-02        | 0.13094902   | 0.0212152    | 0.13094902      | 0.0212152    | 0.002470247  | 0.0494193                 | 0.03615351   | 0.01633204   | 0.01224196      | 0.0077266    | 0.0164618    | 0.000577378                         | 1.37E-04     | 0.001137964  | 0.5645465       | 0.552469     | 0.5794661    | 3.402965        | 3.765041     | 3.29691      | 0.0415666 | 0.0131444  | 0.0479555 |
| 75          | 8.81E-02        | 0.12518198   | -0.0054089   | 0.12518198      | -0.0054089   | -0.01900383  | 0.0425123                 | 0.02925123   | 0.0157897    | 0.01087307      | 0.00544969   | 0.0153322    | 0.000574154                         | -4.90E-07    | 0.001007098  | 0.567785        | 0.5554038    | 0.5801333    | 3.92275         | 3.65849      | 3.18709      | 0.0386769 | 0.0127038  | 0.0448529 |
| 76          | 8.46E-02        | 0.10718857   | -0.05692084  | 0.10718857      | -0.05692084  | -0.007505564 | 0.0397476                 | 0.02560587   | 0.01469833   | 0.01009996      | 0.00544969   | 0.0144222    | 0.000518859                         | -8.80E-05    | 0.000920336  | 0.5680904       | 0.555651     | 0.5817963    | 3.542833        | 3.177743     | 3.20024      | 0.0384586 | 0.0124363  | 0.0463791 |
| 77          | -7.51E-02       | -0.11019604  | -0.0400022   | -0.11019604     | -0.0400022   | -0.02242172  | 0.0378851                 | 0.02517372   | 0.0157897    | 0.01087307      | 0.00544969   | 0.0153322    | 0.000574154                         | -4.90E-07    | 0.001007098  | 0.567785        | 0.5554038    | 0.5801333    | 3.92275         | 3.65849      | 3.18709      | 0.0386769 | 0.0127038  | 0.0448529 |
| 78          | -7.25E-02       | -0.10744009  | -0.0374412   | -0.10744009     | -0.0374412   | -0.02445704  | 0.0374732                 | 0.0249974    | 0.01499557   | 0.01079016      | 0.00551212   | 0.01393992   | 0.000581874                         | -1.10E-05    | 0.000806576  | 0.566776        | 0.5513499    | 0.5794174    | 3.93993         | 3.605108     | 3.12049      | 0.0387097 | 0.0124363  | 0.0460636 |
| 79          | -5.64E-02       | -0.09350563  | -0.01550937  | -0.09350563     | -0.01550937  | -0.02399734  | 0.0489419                 | 0.03615351   | 0.01633204   | 0.01224196      | 0.0077266    | 0.0164618    | 0.000577378                         | 1.37E-04     | 0.001137964  | 0.5645465       | 0.552469     | 0.5794661    | 3.402965        | 3.765041     | 3.29691      | 0.0415666 | 0.0131444  | 0.0479555 |
| 80          | -1.05E-01       | -0.1510933   | -0.0805404   | -0.1510933      | -0.0805404   | -0.015017086 | 0.0493984                 | 0.032744103  | 0.01606499   | 0.01102625      | 0.005051217  | 0.0166623    | 0.000520261                         | -1.10E-05    | 0.001153997  | 0.5654465       | 0.5548546    | 0.5794949    | 3.99947         | 3.647451     | 3.14028      | 0.0388804 | 0.0124363  | 0.0463791 |
| 81          | -1.15E-01       | -0.15877487  | -0.0718387   | -0.15877487     | -0.0718387   | -0.01212861  | 0.0477992                 | 0.03197608   | 0.01683876   | 0.01169794      | 0.006446173  | 0.0169391    | 0.000572706                         | -1.58E-05    | 0.001011178  | 0.5682606       | 0.5538072    | 0.5817963    | 4.05184         | 3.749372     | 3.46067      | 0.0413498 | 0.0129204  | 0.0076792 |
| 82          | -9.85E-02       | -0.14218945  | -0.0548321   | -0.14218945     | -0.0548321   | -0.02131897  | 0.0374732                 | 0.0249974    | 0.01499557   | 0.01079016      | 0.00551212   | 0.01393992   | 0.000581874                         | -1.10E-05    | 0.000806576  | 0.566776        | 0.5513499    | 0.5794174    | 3.93993         | 3.605108     | 3.12049      | 0.0387097 | 0.0124363  | 0.0460636 |
| 83          | -9.85E-02       | -0.14218945  | -0.0548321   | -0.14218945     | -0.0548321   | -0.02131897  | 0.0374732                 | 0.0249974    | 0.01499557   | 0.01079016      | 0.00551212   | 0.01393992   | 0.000581874                         | -1.10E-05    | 0.000806576  | 0.566776        | 0.5513499    | 0.5794174    | 3.93993         | 3.605108     | 3.12049      | 0.0387097 | 0.0124363  | 0.0460636 |
| 84          | -9.95E-02       | -0.14504859  | -0.0222326   | -0.14504859     | -0.0222326   | -0.00293917  | 0.0329556                 | 0.0161399    | 0.0048853    | 0.00838737      | 0.00399577   | 0.0140764    | 0.000522024                         | -1.17E-04    | 0.000929299  | 0.571148        | 0.556398     | 0.583498     | 3.94958         | 3.81289      | 3.25881      | 0.0320576 | 0.0120347  | 0.0430715 |
| 85          | -1.02E-01       | -0.14410019  | -0.0948513   | -0.14410019     | -0.0948513   | -0.02094868  | 0.0393134                 | 0.0284965    | 0.01406161   | 0.01049023      | 0.00592941   | 0.01338641   | 0.000546362                         | -1.30E-04    | 0.000974194  | 0.5737197       | 0.562136     | 0.582422     | 3.97614         | 3.475706     | 3.27673      | 0.0388084 | 0.0126582  | 0.0439555 |
| 86          | -1.01E-01       | -0.14504859  | -0.0669488   | -0.14504859     | -0.0669488   | -0.010704389 | 0.0386152                 | 0.0276468    | 0.01499557   | 0.01079016      | 0.00551212   | 0.01393992   | 0.000581874                         | -1.10E-05    | 0.000806576  | 0.566776        | 0.5513499    | 0.5794174    | 3.93993         | 3.605108     | 3.12049      | 0.0387097 | 0.0124363  | 0.0460636 |
| 87          | -1.04E-01       | -0.15132857  | -0.06920284  | -0.15132857     | -0.06920284  | -0.007505564 | 0.0397476                 | 0.02560587   | 0.01469833   | 0.01009996      | 0.00544969   | 0.0144222    | 0.000518859                         | -8.80E-05    | 0.000920336  | 0.5680904       | 0.555651     | 0.5817963    | 3.542833        | 3.177743     | 3.20024      | 0.0384586 | 0.0124363  | 0.0463791 |
| 88          | 1.38E-02        | 0.04282678   | 0.0701594    | 0.04282678      | 0.0701594    | 0.000148853  | 0.0438278                 | 0.02214901   | 0.01565068   | 0.00444166      | 0.001288858  | 0.0212374    | 0.000100212                         | -3.28E-05    | 0.001478395  | 0.570432        | 0.5580728    | 0.5765466    | 2.972626        | 2.57012      | 3.24412      | 0.0278856 | 0.0158867  | 0.0009376 |
| 89          | 1.64E-02        | 0.02490843   | 0.0578028    | 0.02490843      | 0.0578028    | 0.00118      |                           |              |              |                 |              |              |                                     |              |              |                 |              |              |                 |              |              |           |            |           |
